RESEARCH ARTICLE

# Signatures of Environmental Adaptation During Range Expansion of Wild Common Bean (*Phaseolus vulgaris*)

**Andrea Ariani<sup>1,2</sup> and Paul Gepts<sup>1\*</sup>**

**1** Department of Plant Sciences / MS1, Section of Crop and Ecosystem Sciences, University of California, Davis, CA 95616-8780

**2** Current address: BASF Agricultural Solutions Belgium NV, Technologiepark 101, 9052, Ghent, Belgium

\* [plgepts@ucdavis.edu](mailto:plgepts@ucdavis.edu)

## 1 **Abstract**

2 Landscape genomics integrates population genetics with landscape ecology, allowing  
3 the identification of putative molecular determinants involved in environmental  
4 adaptation across the natural geographic and ecological range of populations. Wild  
5 *Phaseolus vulgaris*, the progenitor of common bean (*P. vulgaris*), has a remarkably  
6 extended distribution over 10,000 km from northern Mexico to northwestern Argentina.  
7 Earlier research has shown that this distribution represents a range expansion from  
8 Mesoamerica to the southern Andes through several discrete migration events and that  
9 the species colonized areas with different temperature and rainfall compared to its core  
10 area of origin. Thus, this species provides an opportunity to examine to what extent  
11 adaptation of a species can be broadened or, conversely, ecological or geographical  
12 distribution can be limited by inherent adaptedness. In the current study, we applied a  
13 landscape genomics approach to a collection of 246 wild common bean accessions  
14 representative of its broad geographical and climatic distribution and genotyped for  
15 ~20K SNPs. We applied two different but complementary approaches for identifying loci  
16 putatively involved in environmental adaptation: i) an outlier-detection method that  
17 identifies loci showing strong differentiation between sub-populations; ii) an association  
18 method based on the identification of loci associated with bio-climatic variables. This  
19 integrated approach allowed the identification of several genes showing signature of  
20 selection across the different natural sub-populations of this species, as well as genes  
21 associated with specific bio-climatic variables related to temperature and precipitation.  
22 The current study demonstrates the feasibility of landscape genomics approach for a  
23 preliminary identification of specific populations and novel candidate genes involved in  
24 environmental adaptation in *P. vulgaris*. As a resource for broadening the genetic  
25 diversity of the domesticated gene pool of this species, the genes identified constitute  
26 potential molecular markers and introgression targets for the breeding improvement of  
27 domesticated common bean.

28

## 29 **Author Summary**

30 The ancestral form of common bean has an unusually large distribution in the Americas,  
31 extending over 10,000 km from ~35° N. Lat. to ~35° S. Lat. This wide distribution results  
32 from discrete long-range dissemination events to the Andes region from the original  
33 environments in Mesoamerica. It also suggests adaptation to new environments that are  
34 distinct from those encountered in Mesoamerica. In this research, we identified genes  
35 that may be involved in adaptation to climate variables in these new environments using  
36 two methods. A first method – outlier detection – was used to identify genome regions  
37 that differentiated the wild bean groups in the Andes resulting from discrete  
38 dissemination events among themselves and the different groups in Mesoamerica. The  
39 second method – genome-wide association – was used to identify candidate genome  
40 regions correlated with these same variables across the entire distribution from  
41 Mesoamerica to the southern Andes. The two methods identified two sets of candidate  
42 genes, several of which were related to the water status of plants, and illustrate how the  
43 genetic architecture of adaptation following long-range dissemination. This study  
44 provides sets of candidate genes as well as candidate wild bean populations that need  
45 to be corroborated for their use in increasing the water use efficiency of domesticated  
46 beans.

## 47 **Introduction**

48 Climate change represents one of the primary threats for food security worldwide, but especially  
49 in developing countries that rely heavily on agricultural production from smallholder farmers  
50 (Rippke et al., 2016; Campbell et al., 2016). Indeed, several studies have highlighted a  
51 predominant role of climate change in reducing agricultural productivity and increasing inter-  
52 annual variability in crop yields, thus directly affecting food availability and stability (Wheeler  
53 and von Braun, 2013; Challinor et al., 2014). The increase in average temperatures, along with  
54 the higher frequency and intensity of extreme weather conditions, will require the development of  
55 new plant varieties adapted to this changing environment in order to meet future food security  
56 needs (Lobell et al., 2008; Field et al., 2012). The development of new varieties requires the  
57 introduction of genetic diversity into breeding programs to find the correct combinations of  
58 favorable alleles in a specific crop (Ford-Lloyd et al., 2011). The genetic variability available in  
59 domesticated plants is generally low due to the bottleneck effect induced by domestication and  
60 subsequent selection during variety improvement (Ford-Lloyd et al., 2011; Zamir 2001; Gepts  
61 2014), thus new sources of genetic diversity need to be introduced into breeding programs.

62 Crop Wild Relatives (CWRs) represent a large, and mostly unexploited, source of genetic  
63 diversity readily available for plant improvement under climate change (Ford-Lloyd et al., 2011;  
64 Zamire 2001; Gepts 2014; Spillane and Gepts 2001; Brozynska et al., 2016). However, the use of  
65 CWRs in breeding programs for improving stress resistance in domesticated species could be  
66 hindered by the lack of knowledge of the genetic determinants of resistance, difficulties in  
67 phenotyping a large number of individuals under agricultural conditions, and the existence of  
68 linkages between target resistance genes and unfavorable loci subject to linkage drag (Brozynska  
69 et al., 2016; Cortés et al., 2013; Zhang et al., 2017). One possible solution for overcoming the

70 first two difficulties is the integration of environmental and genotypic datasets to understand the  
71 genetic basis of natural selection in wild populations, an approach known as ‘landscape  
72 genomics’ (Schoville et al., 2012; Bragg et al., 2015). In addition, this approach offers both  
73 theoretical and practical applications since it strengthens the understanding of plant natural  
74 adaptation but allows also the identification of germplasm accessions and molecular markers that  
75 could be readily applicable – pending validation - for breeding improvement of domesticated  
76 plants (Anderson et al., 2016).

77 Several methods have been developed for identifying signatures of natural selection (e.g.,  
78 selective sweeps) in natural populations. These methods can be divided mostly in outlier-  
79 detection methods, which identify hard-selection sweeps, and association methods, which  
80 identify soft-selection sweeps (Schoville et al., 2012; Wagner and Fortin, 2013). Outlier-detection  
81 methods are based on population differentiation analysis and aim at identifying loci with drastic  
82 differences in allele frequencies between populations, as measured by  $F_{st}$  (Wright, 1949;  
83 Lewontin and Krakauer, 1973). Although based on the assumption that alleles fixed within sub-  
84 populations could confer an evolutionary advantage in the ecological niche occupied (Haldane,  
85 1930; Kimura, 1962), these methods do not take directly into account climatic data and could be  
86 biased by complex population structure and/or demography (Narum and Hess, 2011). On the  
87 other hand, association methods directly correlate genotypic with environmental data and rely on  
88 the assumption that variations of allele frequencies across environmental gradients are possible  
89 signature of local adaptation (Manel et al., 2010). The theory beneath environmental association  
90 methods are practically the same as that used in Genome Wide Association Studies (GWAS)  
91 (Hirschhorn and Daly, 2005). Both approaches employ mixed model association approaches for  
92 correcting the confounding effects that could be introduced by population structure and  
93 relatedness in the sample (Lipka et al., 2015).

94 Common bean (*Phaseolus vulgaris* L.) is an essential staple crop providing most of proteins  
95 and micronutrients in the diet of the majority of the population in several developing countries  
96 (Gepts et al., 2008). The regular consumption of this crop provides several health benefits, like  
97 reducing the risks of heart disease, obesity, and diabetes (Messina, 2014). Its cultivation improves  
98 agricultural sustainability thanks to its nitrogen-fixing ability (Rubiales and Mikić, 2015).  
99 Common bean shows a surprisingly high genetic diversity, with the presence of at least three  
100 geographically isolated and divergent wild gene pools located in 1) Mesoamerica and the  
101 northern Andes (MW); 2) the Central Andes (Ecuador and northern Peru; PhI); and 3) the  
102 Southern Andes (southern Peru, Bolivia, and northwestern Argentina; AW) (Chacón et al., 2007;  
103 Koenig and Gepts, 1989; Debouck et al., 1993; Mamidi et al., 2013). Common bean was  
104 domesticated independently in Mexico and the Southern Andes, producing locally-adapted  
105 varieties and landraces with specific characteristics (Bitocchi et al., 2013; Blair et al., 2012;  
106 Gepts et al., 1986, Mamidi et al., 2011, Rossi et al., 2009, Singh et al., 1991). The intermediate  
107 gene pool in the Central Andes was not domesticated (Debouck et al., 1993; Kami et al., 1995).  
108 This wild group has been recently identified as a cryptic sister species of *P. vulgaris*, named  
109 *Phaseolus debouckii* A. Delgado, which was disseminated from the center of origin of this  
110 species in Mesoamerica and remained geographically isolated from the other wild gene pools of  
111 this species (Rendón-Anaya et al., 2017a,b).

112 Wild common bean is an annual vine plant, which is distributed from the state of Chihuahua  
113 in northern Mexico (approx. 35° N. Lat.) to the Córdoba province in Argentina (approx. 35° S.  
114 Lat.), encompassing almost 70 latitudinal degree or about 10,000 km (Gepts, 1998; Porch et al.,  
115 2013). This species grows in both tropical and sub-tropical environments across the Americas at  
116 elevations between 500 and 2,000 m a.s.l. with annual rainfall from 500 to 1,800 ml (Cortés et  
117 al., 2013, Gepts, 1998, Porch et al., 2013). This broad geographic and ecological distribution

118 suggests the existence of genotypes adapted to a wide variety of environmental conditions, which  
119 could be useful donors of abiotic stress resistance for improving domesticated common bean  
120 production under climate change (Porch et al., 2013, Acosta-Gallegos et al., 2007).

121 Future projection of climate changes under different models predict a reduction of suitability  
122 for common bean production in areas where this plant is an essential staple crop and also a source  
123 of household income, hence endangering food security and increasing rural poverty in already  
124 susceptible areas of the world (Ramirez-Cabral et al., 2016). For this reason, it is essential to  
125 understand the molecular mechanisms involved in wild common bean adaptation to different  
126 environments and to identify molecular markers that could be useful in breeding improvement of  
127 this crop. The application of landscape genomics approaches in wild common bean could help  
128 address these issues, as demonstrated previously in several other plant species like soybean,  
129 barley, *Medicago truncatula*, maize, and *Brachypodium* (Anderson et al., 2016, Westengen et al.,  
130 2012, Yoder et al., 2014, Dell'Acqua et al., 2014, Abebe et al., 2015).

131 In the current study, we applied a landscape genomics approach to understand environmental  
132 adaptation to a dataset comprised of 246 wild common beans genotyped for ~20K previously  
133 developed SNPs (Ariani et al., 2018). A similar analysis was performed previously in this species  
134 using 148 SNPs located in genes putatively involved in adaptation to biotic or abiotic stresses  
135 (Rodriguez et al., 2016). However, the higher number of markers developed in this study and the  
136 broader and more even distribution across the genome of these markers, results in a more  
137 comprehensive and precise analysis of environmental adaptation in this species. In addition, the  
138 genes identified as associated with environmental variables can be validated and applied in the  
139 future for domesticated common bean breeding improvement.

## 140 **Results**

### 141 **Bio-climatic data analysis**

142 The bio-climatic variables downloaded from the WorldClim database concern mostly  
143 temperature and rainfall during the year. These bio-climatic variables were developed for  
144 generating biologically informative variables useful for species distribution modeling and  
145 landscape genomics approaches. In our analyses, the 19 bio-climatic variables analyzed showed a  
146 great degree of correlation, in particular for similar variables like bio\_14 (precipitation of the  
147 driest month) and bio\_17 (precipitation of the driest quarter), or bio\_13 (precipitation of the  
148 wettest month) with bio\_16 (precipitation of the wettest quarter) (**S1 Fig**).

149 The loading plot on the first two PCs showed some correlations between bio-climatic  
150 variables and principal components, as well as strong correlations between some of the bio-  
151 climatic variables analyzed (**Fig 1A**). In particular, bio\_12 (annual precipitation) and bio\_4  
152 (temperature seasonality) showed a strong correlation with PC1. On the other hand, bio\_5 (max  
153 temperature of the warmest month), bio\_8 (mean temperature of the wettest quarter), and bio\_10  
154 (mean temperature of the warmest quarter) showed a strong correlation with PC2. Interestingly,  
155 most of the variables related to precipitation (bio\_12, bio\_14, bio\_16, bio\_17, bio\_18, and  
156 bio\_19) were positively correlated with PC1, the variables related to seasonal variation (bio\_2,  
157 bio\_4, bio\_7, and bio\_15) were negatively correlated with PC1, while the variables related to  
158 temperature (bio\_1, bio\_5, bio\_8, bio\_9, bio\_10, and bio\_11) were negatively correlated with  
159 PC2.

160 In addition, this PCA on the bio-climatic variables for the genotypes analyzed showed that  
161 the first two principal components (PC1 and PC2) explained 75% of the variance (**Fig 1B**), while  
162 PC1 to PC4 explained cumulatively > 90% of the variance (**S2 Fig**). A plot of PC1 vs. PC2



163 showed some differences in the distribution of the different gene pools of wild common bean in  
164 the PC dimensional space. In particular, the majority of genotypes from the Mesoamerican (MW1  
165 to MW3) and Intermediate (PhI) gene pools were distributed towards the positive part of PC1,  
166 while the Andean group were located in the negative part of this axis (**Fig. 1A**). Given the origin  
167 of the genus *Phaseolus* in the Mesoamerican area (with local descendants represented by MW1  
168 and MW2), three range expansions characterize this species: 1) PhI, which established wild  
169 populations on the western slope of the Andes in Ecuador and northern Peru; 2) AW,  
170 encompassing wild populations in the southern Andes; and 3) MW3, a more recent and perhaps  
171 ongoing dissemination to Central America and the eastern slope of the northern Andes (Ariani et  
172 al., 2018). Inspection of **Fig 1A** and **S3 Table** shows that the distribution of the PhI group, which  
173 resulted from the earliest range expansion event, correlates - on bioPC3 - with Isothermality  
174 (bio\_3), Temperature Seasonality (bio\_4), bio\_13 (Precipitation of the Wettest Month), and  
175 bio\_18 (Precipitation of the Warmest Quarter), consistent with a dispersal to an equatorial region.  
176 In contrast, the predominant distribution of the southern Andean accessions (AW) in the upper  
177 left quadrant of **Fig 1** is consistent with earlier observations that the populations of this gene pool  
178 are distributed in cooler and drier locations, as shown by correlations with bio\_6 (Minimum  
179 Temperature of the Coldest Month), bio\_9 (Mean Temperature of the Driest Quarter, bio\_11  
180 (Mean Temperature of the Coldest Quarter) and bio\_1 (Annual Mean Temperature). This  
181 dissemination occurred with a concomitant lower potential evapotranspiration (Ariani et al.  
182 2018). Dispersal of the MW3 group (**Fig 1**) increased Isothermality (bio\_3) and decreased  
183 Seasonality (bio\_4) and Precipitation Seasonality (bio\_15); it also increased Precipitation during  
184 the Driest Month (bio\_14) and Driest Quarter (bio\_17).

185

## 186 **Genome scan of selection**

187 An analysis of the scree plot of the PCA analysis conducted on SNP data (molecular PCA)  
188 showed that a quarter of the variance could be explained by the first principal component, even  
189 though molPC2 to molPC5 also explained a considerable amount of variance in the data (**Fig**  
190 **2A**). On the other hand, after molPC5, no large increase in the cumulative explained variance  
191 could be detected. This pattern of the scree plot is representative of a possible range expansion of  
192 this species across the Americas, as hypothesized by a prior evolutionary analysis of this same  
193 collection (Ariani et al., 2018). Visual inspection of p-value distribution for genome scans for  
194 K=2 and K=3 showed a large proportion of low and high p-values, while for K=4 and K=5 the  
195 distribution of p-values was more uniform, especially for K=5 (**S3 Fig**). For this reason, we  
196 selected K=5 for further genome scan analysis.

197 A plot of genetic PCA analysis performed with the pcadapt algorithm was able to  
198 discriminate between the different wild gene pools of this species (**Fig 2B**). In particular, the  
199 MW1-MW3 groups were mostly localized on the positive part of the molecular PC1 (molPC1)  
200 axis, while the AW gene pool was localized towards the negative end of molPC1. Interestingly,  
201 molPC1 mostly differentiated MW vs. AW, while molPC2 and molPC3 clearly separated the  
202 MW+AW groups from the PhI (**Fig 3**).

203 The genome scan analysis with K=5 identified 84 significant variants (Bonferroni-corrected  
204 p-value  $\leq 0.001$ ) distributed throughout the 11 chromosomes of common bean (**Fig 4**), tagging 70  
205 annotated genes (**S1 Table**). The highest number of tagged genes were identified on  
206 chromosomes Pv02 and Pv04 with 15 and 11 genes, respectively. The genes identified as selected  
207 by genome scan analysis were mostly related to plant development (17 genes), hormone response  
208 (10 genes), ion homeostasis (5 genes), and response to stress (9 genes).

209 Of the 70 genes identified by the analysis, 20 of them (28%) were located within a haplotype  
210 block (**S1 Table**). When mapping the significant SNPs identified by genome scan analysis to the  
211 latest reference genome (v2.1), 62 genes (88%) were confirmed as putatively under selection also  
212 in this assembly (**S1 Table**). Interestingly, among the genes not identified in v2.1, three were not  
213 present in the annotation file, while one gene (Phvul.001G080400) was renamed Phvul.L006501  
214 and was located to a scaffold instead of chromosome 1.

215 Among the genes identified, we found several related to drought and/or abscisic acid (ABA)  
216 response. Phvul.002G331700, a homolog of the *Arabidopsis* KUP6, is involved in potassium  
217 uptake transporter and stomata movement and Phvul.002G143100 is a glycine-rich domain  
218 protein (GRP) involved in auxin signaling and stress response. Phvul.004G102800 is a homolog  
219 to *Arabidopsis* SLAH3 involved in ABA response; Phvul.008G161000 is a homolog of  
220 *Arabidopsis* CAO, a gene related to chlorophyll biosynthesis and ABA signaling; and  
221 Phvul.009G050600 is a gene annotated as an importin  $\beta$  protein involved in ABA and drought  
222 response in *Arabidopsis*.

223

## 224 **Genome-wide association analysis**

225 A genome-wide association analysis identified 49 genes associated with the bio-climatic  
226 variables selected for this analysis. Except for the bio\_18 variable (Precipitation of Warmest  
227 Quarter), for which no associations were detected, the other variables were associated with at  
228 least one gene. The bio-climatic variables with the highest number of associated genes were  
229 bio\_3 (Isothermality) with 29 genes, and bio\_12 (Annual precipitation) with 11 genes (**S2 Table**).

230 The associated genes were located in all 11 common-bean reference genome chromosomes,  
231 except for chromosome Pv06 where there were no significantly associated SNPs. Some of the

232 genes were associated with more than one bio-climatic variables (**Fig 5**), suggesting the  
233 possibility that they could be related to multiple environmental stimuli.

234 Of these 49 genes identified by genome-wide association analysis, only 10 (20%) were  
235 located within a haplotype block (**S2 Table**). In addition, when mapping significant SNPs  
236 identified by association analysis to the latest reference genome (v2.1), 44 genes (88%) were  
237 confirmed as putatively associated with environmental variables also in this assembly (**S2 Table**).  
238 Four out of five of the missing genes were not present in the v2.1 annotation file.

239 Among the genes significantly associated with one or more bio-climatic variables, we found  
240 several of them related to hormone response, ion homeostasis, plant development, metabolism,  
241 and response to stress, in particular drought (**S2 Table**). Among the genes identified, we found  
242 some interesting candidates probably involved in stress resistance, like Phvul.001G034400, a  
243 homolog of *Arabidopsis* KEA6 involved in potassium homeostasis; Phvul.010G155000,  
244 homologous to an *Arabidopsis* phospholipase D  $\alpha$  1 (PLD $\alpha$ 1) involved in ABA signaling;  
245 Phvul.010G035200 homolog of a cytokinin responsive factor homologous of *Arabidopsis*; and  
246 Phvul.008G161700, homologous to an *Arabidopsis* thioredoxin involved in ROS signaling.  
247 Interestingly, there was no overlap between the genes identified by genome scan and association  
248 analysis.

249

## 250 **Candidate gene allele distributions**

251 To evaluate the geographic distribution of alleles in candidate genes identified by genome scan  
252 and association analysis, we clustered the genotypes into groups with a K-means clustering  
253 approach on the molecular PCs calculated with pcadapt. The advantage of a K-means clustering  
254 approach, over a standard population structure analysis, is that it clearly assigns individuals to

255 specific clusters. The K-means clustering approach identified three clusters for the MW group,  
256 with two clusters (MW1 and MW2) located in Mexico and another (MW3) in Central America  
257 and Colombia, plus one cluster each for the intermediate (PhI) and the Andean (AW) group (**S4**  
258 **Fig**). Interestingly, the clustering results closely resembled those obtained in a previous study  
259 with more advanced population structure approaches (**S3 Table**) (Ariani et al., 2018).

260 The allele frequency distribution of the candidate genes identified by genome scan showed  
261 drastic differentiation between the genetic groups identified (**Fig 6**), as expected from the  
262 assumptions of the genome scan approach, with some alleles being private for just one of the  
263 genetic group (like the alternative alleles for GRP and CAO that were observed only in the AW  
264 group). On the other hand, the genes identified by association analysis showed a wide variety of  
265 allele frequencies distribution across the different genetic groups (**Fig 7**), even though some  
266 genes had only a single allele in some of the populations (like the reference allele for PLD and  
267 TRX in the PhI and AW group). In general, the genes identified by association analysis showed a  
268 higher variation of allele frequencies among the different MW groups.

## 270 **Discussion**

271 Wild common bean (*P. vulgaris*) grows in several areas of Mexico and Central and South  
272 America, from northern Mexico to northwestern Argentina across ~70 latitudinal degrees, in  
273 different environments with a wide range of altitudes, average temperatures, and rainfall regimes  
274 (Cortés et al., 2013, Gepts 1998, Porch et al., 2013). Thanks to this exceptional geographic  
275 distribution, its complex evolutionary history, and high levels of genetic diversity, this species  
276 represents an extraordinary resource for evolutionary studies (Chacón et al., 2007, Koenig and  
277 Gepts, 1989, Mamidi et al., 2013, Rendón-Anaya et al., 2017a,b, Bitocchi et al., 2012, Kwak and  
278 Gepts, 2009), but can be also a conceptual framework for testing and validating landscape  
279 genomics approaches in wild plant populations and its feasibility for breeding improvement of  
280 domesticated crops (Anderson et al., 2016). In the current study, we identified several genes that  
281 could be involved in environmental adaptation in wild common bean by combining genome scan  
282 and association analysis. If validated, the genes identified could be useful candidates for  
283 improving stress resistance in domesticated common bean. The concordance between the genes  
284 tagged by significant SNPs identified between the two different reference genomes assembly  
285 suggests also high concordance between the two versions, with possible minimal differences due  
286 to the different sequencing data used for the assembly. In addition, the integration of haploblocks  
287 information with the genes identified by our analysis showed that most of these genes (70-80%)  
288 are located in regions with low LD in wild common bean. This result suggests that those same  
289 genes could be located in regions with relatively high recombination frequencies, thus facilitating  
290 possible introgression into the domesticated gene pool.

291

## 292 **Genome scan of selection**

293 Molecular PCA analysis clearly separated the three major groups of this species (MW1-MW3,  
294 PhI, and AW), as observed in previous research. In particular, the Intermediate gene pool (PhI)  
295 was shown again to most diverged group from the Mesoamerican and Andean gene pools,  
296 especially along the molPC2 and molPC3 axes (**Fig 2**), further supporting the hypothesis that this  
297 gene pool is actually a distinct species of *Phaseolus* (Rendón-Anaya et al., 2017a,b). A genome  
298 scan based on molecular PCA analysis identified several genes with a strong signature of  
299 selection (hard-selection sweep) that could be involved in environmental adaptation across the  
300 geographical range of this species. The identification of several genes involved in plant  
301 development and hormone and stress response, suggests that the different populations of this  
302 species adapted to their environment by integrating and adjusting to developmental, hormonal  
303 and environmental cues. Several genes among those identified could reflect adaptation to abiotic  
304 stress. These genes are also of interest for improving stress resilience in common bean, like the  
305 KUP6 potassium (K<sup>+</sup>) transporter located on chromosome Pv02 (Phvul.002G331700). This gene  
306 has been directly linked to drought stress by regulating ABA response and stomata movements in  
307 *Arabidopsis* (Osakabe et al., 2013). A homolog of this gene located on chromosome Pv03  
308 (Phvul.003G052900) showed a higher genetic and transcriptional diversity in Mesoamerican  
309 domesticated beans than in wild ones (Bellucci et al., 2014; Bitocchi et al., 2017). Due to the  
310 possible role of KUP-like genes in response to drought stress and their identification as selected  
311 genes in both wild and domesticated populations of common bean, further studies should focus  
312 on the evolution and diversity of this gene family in this species.

313 Another gene identified in the current study and possibly involved in adaptation to drought  
314 response in wild common bean is Phvul.004G102800, homolog of SLAH3 of *Arabidopsis*, which

315 was annotated as an S-type anion channel. This type of channels is rapidly regulated by ABA and  
316 stimulates stomata closure by inhibiting inward K<sup>+</sup> channels, thus reducing K<sup>+</sup> influx into guard  
317 cells (Geiger et al., 2011; Zhang et al., 2016). In addition to being involved in drought stress  
318 response, this same gene has been recently identified also as related to salinity stress response in  
319 *Arabidopsis* by regulating ion homeostasis between root and shoots (Cubero-Font et al., 2016).

320 The chlorophyll alpha oxygenase (Phvul.008G161000), identified as a gene under selection  
321 (and a homolog of *Arabidopsis* CAO), has a primary role in the biosynthesis of chlorophyll b  
322 (Espineda et al., 1999). However, *Arabidopsis* mutants for this gene showed a reduction of  
323 antioxidant compounds (specifically glutathione) in guard cells and an increased ABA sensitivity  
324 in comparison to wild type plants (Jahan et al., 2016), suggesting a possible involvement of this  
325 gene in adaptive response to stressful environments.

326 Phvul.002G143100, identified as selected within the different sub-populations of *P. vulgaris*,  
327 is annotated as a glycine-rich domain protein, homologous of *Arabidopsis* GRDP2 gene. GRP are  
328 a multi-gene superfamily present in several organisms, including plants (Sachetoo-Martins et al.,  
329 2000). This gene family has been associated in plants with several developmental processes and  
330 in responses to both biotic and abiotic stresses (Mangeon et al., 2010). A recent study focusing on  
331 the characterization of the direct *Arabidopsis* homologs of this gene (ATGRDP2) demonstrated  
332 that this gene regulates plant growth and flowering by accumulating higher level of indole-3-  
333 acetic acid and improves abiotic stress response (Ortega-Amaro et al., 2014). In particular, the  
334 over-expression of this gene in transgenic plants increased growth rate and reduced days to  
335 flowering. It also increased salt tolerance in comparison to wild-type plants.

336 In addition to the previous genes identified as selected by genome scan analysis and  
337 putatively involved in environmental response in plants, Phvul.009G050600 was identified and  
338 annotated as an importin  $\beta$ -protein homologous to *Arabidopsis* KPNB1. This gene mediates the



339 import of proteins and protein complexes between the cytoplasm and the nucleus and is essential  
340 in regulating signal transduction pathways in response to environmental and developmental  
341 stimuli (Merkle, 2003). In particular, the *Arabidopsis* homolog of Phvul.009G050600  
342 (AtKPNB1) has been directly related to ABA and drought response previously (Luo et al., 2013).

343

#### 344 **Genome-wide association analysis**

345 Association analysis between genotypic data and bio-climatic variables identified several genes  
346 significantly associated with one or more bio-climatic variables, putatively involved in plant  
347 development, ion homeostasis, and stress response. Among these genes, several could be useful  
348 as potential molecular markers for improving abiotic stress in domesticated common bean. As  
349 examples, we identified a gene related to potassium homeostasis and annotated as a K<sup>+</sup> efflux  
350 antiporter (KEA) gene associated with bio\_12 (Annual Precipitation) and bio\_7 (Temperature  
351 Annual Range). Potassium is an essential macronutrient involved in several physiological and  
352 developmental processes in all living organism, and in plants this cation is also essential in  
353 maintaining plant osmotic potential, cytosolic pH, and stomata movement (Shabala, 2003,  
354 Sharma et al., 2013). In addition, variation in K<sup>+</sup> homeostasis is one of the first responses to  
355 several abiotic and biotic stresses in plants, allowing the plants to rapidly respond to stressful  
356 conditions (Shabala and Pottosin, 2014) and making the KEA gene identified in the current study  
357 an interesting candidate gene for further analysis.

358 Another gene, significantly associated with bio\_14 (Precipitation of Driest Month) is  
359 Phvul.010G155000, which is annotated as a phospholipase (PLD $\alpha$ 1). This gene is involved in the  
360 biosynthesis of phosphatidic acid (PA), which is an important signaling molecule in response to  
361 several stresses in plants (Saucedo-García et al., 2015). In particular, PA is involved in the ABA

362 signaling cascade and regulates stomata closure in plants by directly interacting and blocking  
363 ABI1, an inhibitor of ABA response in plants (Zhang et al., 2004). This gene regulates stomatal  
364 closure and ABA-dependent hydrogen peroxide (H<sub>2</sub>O<sub>2</sub>) production in *Vicia faba* as well (Qu et  
365 al., 2014), making this gene an interesting candidate for improving drought response in common  
366 bean.

367 An additional gene, significantly associated with bio\_5 (Max Temperature of Warmest  
368 Month), is Phvul.010G035200, annotated as a cytokinin response factor homologous of  
369 *Arabidopsis* CRF4. Cytokinin is an essential plant hormone involved in growth and  
370 developmental processes (Durán-Medina et al., 2017, Kieber and Schaller, 2014), but in recent  
371 years it has also been implicated in the response and adaptation to different environmental  
372 stresses (Novakova et al., 2007, O'Brien and Benková, 2013). CRF genes are a class of plant  
373 transcription factors responsive to cytokinin that integrate hormonal and environmental signals  
374 for adapting plant growth and development in response to the environment (Kim, 2016, Rashotte  
375 and Goertzen, 2010). The *Arabidopsis* homolog of this gene has been previous related to  
376 acclimation to cold temperatures (Zwack et al., 2016). Since this gene has been associated with  
377 temperature variables in wild common bean, it could also be involved in adaptation to  
378 temperature variation in this species.

379 Another gene of interest, Phvul.008G161700, is significantly associated with bio\_3  
380 (Isothermality) and is annotated as a thioredoxin protein. These proteins are involved in the  
381 regulation of oxidative stress response and in scavenging reactive oxygen species (ROS) in plants  
382 (Gelhaye et al., 2005). Other than being simple byproducts of cellular metabolism, ROS  
383 molecules has been recognized as important signaling molecules that regulate the response to  
384 several environmental stresses in plants (D'Autréaux and Toledano, 2007, Sewelam et al., 2016).  
385 Due to their ability to control the redox state of the cell, thioredoxin represents a key component

386 of the ROS signal transduction pathways in plants and in the response to environmental stress  
387 (Sevilla et al., 2015). Thus, this gene could constitute another interesting candidate gene for  
388 improving stress resistance in domesticated common bean.

389

### 390 **Comparison of genes identified by genome scan and GWAS**

391 Even though the genes identified by outlier-detection methods (hard-selection sweeps) and  
392 association methods (soft-selection sweeps) are involved in similar processes, there was no  
393 overlap between the candidate genes identified by the two approaches in this study. This could be  
394 the direct result of the different assumptions underlying these methods. Indeed, genome scan  
395 analysis identify genes that shows drastic variations of allele frequencies between natural  
396 subpopulations (Schoville et al., 2012, Wagner and Fortin, 2013). This approach is independent  
397 from bio-climatic variables, thus the SNPs identified as under selection by this analysis could be  
398 the results of selective mechanisms not considered by association analysis, like soil composition,  
399 pathogen pressure and/or competition with other plants. On the other hand, association analyses  
400 identify SNPs showing slight variations in allele frequencies across environmental gradients that  
401 can increase environmental adaptation in natural populations (Schoville et al., 2012, Wagner and  
402 Fortin, 2013). This selection process usually acts on natural standing variations and favor the  
403 presence of multiple alleles and haplotypes, instead of allele fixation within populations  
404 (Hermisson and Pennings, 2005).

405

### 406 **Epilogue**

407 In conclusion, landscape genomic analysis of wild common bean genotypes allowed us to  
408 identify several genes showing a signature of presumed selection in this species. It is likely that

409 two methods – genome scan and GWAS - are indeed complementary for understanding local  
410 adaptation in wild plant populations, as observed previously in other species (Dell'Acqua et al.,  
411 2014, Pyhäjärvi et al., 2013) and are a feasible approach for the preliminary identification of  
412 novel candidate genes for adaptation to climatic differences along the exceptionally broad habitat  
413 of wild common bean. Further corroboration of the actual role of the candidate genes in  
414 adaptation will come from introgression of these genes from wild to domesticated beans and a  
415 concurrent phenotypic analysis showing improved performance under stress conditions.

416 Our long-term objective is to identify both populations (Ariani et al., 2018) and genes  
417 (this study) that have been putatively under selection by the abiotic stresses of temperature,  
418 rainfall, and the related variable, potential evapotranspiration. Identification of these potential  
419 sources of genetic tolerance are only a first step towards the development of more stress-resilient  
420 beans. The next step is to corroborate the effectiveness of these wild populations and these  
421 candidate genes as a source of stress-tolerance through indirect selection for these genes in  
422 selected populations resulting from the cross between candidate populations and domesticated  
423 testers (Acosta-Gallegos et al., 2007). In a recent paper, Cortés and Blair (2018) identified 115  
424 SNPs tagging 77 annotated genes potentially selected by drought tolerance among a set of wild  
425 bean populations, using correlations between SNPs and an average yearly drought index. They  
426 argued that drought tolerance and performance under well-watered conditions were mutually  
427 incompatible. The testcrosses just mentioned between domesticated testers and wild populations  
428 that have been subjected to different drought stress conditions, as identified in this study and  
429 Ariani et al., (2018), will allow us to examine this hypothesis, which has considerable  
430 implications for breeding for stress tolerance.

431

## 432 **MATERIALS AND METHODS**

### 433 **Plant material and genotypic data**

434 A panel of 246 wild *P. vulgaris* accessions, previously genotyped with a Genotyping-By-  
435 Sequencing (GBS) protocol using the *Cvi*AI restriction enzyme (Ariani et al., 2018), was  
436 analyzed. The panel was representative of the ecological and geographic distribution of this  
437 species and included 157 genotypes of the Mesoamerican (MW), 77 of the Southern Andes  
438 (AW), and 12 of the Central Andes (Northern Peru-Ecuador; PhI) gene pools. The SNPs  
439 considered in this study were those with a Minor Allele Frequency (MAF)  $\geq 0.05$  and less than  
440 20% missing data. The list of the accessions sequenced, with gene pool information and  
441 geographic coordinates, is available in **S4 Table**, while genotyping data in VCF format are  
442 available as a Dash dataset (<https://doi.org/10.25338/B8DW39>). The seeds were provided by the  
443 Genetic Resources Unite at the International Center of Tropical Agriculture (CIAT, Cali,  
444 Colombia) and the United States Department of Agriculture Western Regional Plant Introduction  
445 Station (Pullman, WA).

446

### 447 **Spatial Analysis**

448 Spatial analyses were conducted within the R statistical environment ([www.r-project.org](http://www.r-project.org)) using  
449 the *dismo* package and its dependencies (*raster* and *sp*). The geographic coordinates of the  
450 individuals analyzed in this study were used for retrieving the 19 bio-climatic summary variables  
451 from the WorldClim database (<http://www.worldclim.org/>). The data were downloaded at a 30-  
452 second resolution (approximately 0.86 km<sup>2</sup> at the equator). In order to identify a subset of bio-  
453 climatic variables that best summarizes our dataset, we performed a Principal Component  
454 Analysis (PCA) on the scaled and centered variables using the *ChemometricsWithR* package

455 (Wehrens 2011). We then selected the first two variables with the highest positive and negative  
456 loading in the first four principal components (PC1 to PC4) (**S3 Table**). Since some of the  
457 selected bio-climatic variables showed a high correlation (**S1 Table**), we decided to pick only one  
458 of the correlated variables for further analysis. The final bio-climatic variables analyzed in this  
459 study were: bio\_3 (Isothermality), bio\_5 (Max Temperature of Warmest Month), bio\_6  
460 (Minimum Temperature of Coldest Month), bio\_7 (Temperature Annual Range), bio\_12 (Annual  
461 precipitation), bio\_14 (Precipitation of Driest Month), and bio\_18 (Precipitation of Warmest  
462 Quarter). In addition to the above-mentioned bio-climatic variables, we included also annual  
463 Potential EvapoTranspiration (PET) downloaded from the Global Aridity and PET Database  
464 (<http://www.cgiar-csi.org/data/global-aridity-and-pet-database>).

465

## 466 **Genome Scans for Selection and Association Analysis**

467 Genome scans for selection (i.e., hard selective sweeps) were performed on the final set of SNPs  
468 using the pcadapt R package (Luu et al., 2017), an algorithm able to detect population structure  
469 and outlier loci by performing a PCA analysis on SNP genotypic data. The best number of sub-  
470 populations was inferred by visually evaluating the scree plot of eigenvalues for the different  
471 principal components (K); the genomic scans for selection were performed for K in the range 2-5.  
472 The p-values obtained by this analysis were corrected using the Bonferroni method and only  
473 SNPs with a corrected p-value  $\leq 0.001$  were considered as significant.

474 Association analysis (i.e., soft selective sweeps) was performed separately for each of the  
475 seven selected bio-climatic variables and annual PET. For this analysis, we used the LFMM  
476 algorithm (Frichot et al., 2013) implemented in the LEA R package (Frichot and François, 2015).  
477 This method was developed specifically for identifying signature of environmental selection in

478 genomic data and can efficiently correct for population history and isolation-by-distance (IBD).  
479 To correct for spurious association determined by population structure or IBD, the number of  
480 latent factors (i.e., populations) needs to be decided *a priori* and subsequently evaluated using the  
481 genomic inflation factor parameter. Since LFMM is based on Monte Carlo Markov Chain  
482 (MCMC) sampling, we ran it multiple times for each association analysis and then averaged the  
483 p-values (as suggested in the software documentation). To identify the best number of  
484 populations (K) for association with each bio-climatic variable, we performed three runs of the  
485 program with K in the range 4-10 and estimated the inflation factor from these runs (Devlin and  
486 Roeder, 1999). Plots of the inflation factor for different values of K (**S5 Fig**) showed that the best  
487 inflation factor for reducing False Discovery Rate (FDR) (i.e., closest to 1) was six for Bio12,  
488 Bio14, and Bio5, and 7 for Bio6, Bio18, Bio7, Bio3, and PET. Based on this preliminary  
489 screening, we re-ran the program with the best number of K for 10 times with 10,000 MCMC  
490 iterations and a burn-in period of 1,000. The p-values were then averaged across the different  
491 runs and corrected using the Bonferroni method. SNPs with a corrected p-value  $\leq 0.05$  were  
492 considered as significant.

493

#### 494 **Identification of putatively selected genes**

495 The distance between significant SNPs, identified by genome scans or association analysis based  
496 on the *P. vulgaris* v1.0 genome annotation (<https://phytozome.jgi.doe.gov/pz/portal.html>)  
497 (Schmutz et al., 2014), was evaluated using the GenomicRanges/rtracklayer packages or R  
498 (Lawrence et al., 2009, 2013). Only genes within 5 Kb of a significant SNPs were chosen as  
499 putatively selected genes. This 5 Kb upper limit was selected based on the genotyping approach  
500 used in this study (that did not allow a full coverage of the genome), but also considered the

501 presence of possible regulatory regions immediately adjacent to gene sequences (Li et al., 2012).  
502 To understanding if the genes identified by significant SNPs were in regions with high linkage  
503 disequilibrium (LD), we identified haploblocks from the complete set of SNPs data using the  
504 PLINK program (Purcell et al., 2007) with default parameters. For downstream analysis, we  
505 considered only blocks longer than 100 bp. We then integrated this information with the genes  
506 identified as putatively selected by genome scan or association analysis, to determine if these  
507 candidate genes were located in haploblock regions. This analysis identified 1338 haplotype  
508 blocks evenly distributed across the 11 chromosomes (Dash dataset:  
509 <https://doi.org/10.25338/B8DW39>).

510

### 511 **Comparison with latest genome reference**

512 A new genome reference for *P. vulgaris* (v2.1) has been released on Phytozome although it has  
513 yet to be peer-reviewed. We compared the genes and the SNPs identified by our analysis between  
514 the old (v1.0) and the newest (v2.1) genome version. To compare the results between the two  
515 genomes, we mapped the significant SNPs, identified by genome scan and association analysis in  
516 the v1.0 genome reference, onto the v2.1 version. For this analysis, we extracted the 100 bp  
517 upstream and downstream of a significant SNPs (200 bp window) in the v1.0 version and mapped  
518 them to the v2.1 reference genome using nucleotide BLAST (Camacho et al., 2009). For each  
519 SNP and relative flanking region, we then selected the best hit in the v2.1 genome and identified  
520 the genes annotated in the new reference located within 5 Kb of the hit (as described in the  
521 ‘Identification of putatively selected genes’ section).

522



## 523 **Candidate genes evaluation across genetic groups**

524 For clustering individuals based on genetic groups and visualizing allele frequency variations  
525 across clusters, we applied a K-means clustering approach using the first 5 PCs obtained from  
526 pcadapt analysis. We selected K=5 as the best number of clusters, based on the scree plot of the  
527 eigenvalues obtained with pcadapt. The clustering analysis was performed using the python  
528 scikit-learn library (Pedregosa et al., 2011). For each genetic cluster, we calculated allele  
529 frequencies for SNPs tagging candidate genes using VCFtools (Danecek et al., 2011) and plotted  
530 them on genetic maps using R.

531

532

533

## 534 **Acknowledgements**

535 This work used the Vincent J. Coates Genomics Sequencing Laboratory at UC Berkeley,  
536 supported by NIH S10 Instrumentation Grants S10RR029668 and S10RR027303. We thank the  
537 Genetic Resources Unit of the Centro Internacional de Agricultura Tropical (CIAT, Cali,  
538 Colombia) and the Western Regional Plant Introduction Station of the USDA (Pullman, WA) for  
539 providing samples of wild *P. vulgaris* used in this study.

540

## 541 **Funding**

542 This project was supported by Agriculture and Food Research Initiative (AFRI) Competitive  
543 Grant No. 2013-67013-21224 from the USDA National Institute of Food and Agriculture.

544

## 545 **Availability of Data and Materials**

546 Raw sequencing data are available at the NCBI Sequence Read Archive

547 (<http://www.ncbi.nlm.nih.gov/sra>) under the accession numbers SRX2771627 and SRX2771628.

548 The variants file and the relative geographical coordinates used for performing the analysis are  
549 available as additional files of the current manuscript.

550

## 551 **Authors' contributions**

552 AA performed the experiment, analyzed the data and wrote the manuscript. PG designed the  
553 experiment, supervised the work and wrote the manuscript. All authors approved the final version  
554 of the manuscript.

555

## 556 **Ethics approval and consent to participate**

557 Not applicable

558

## 559 **Consent for publication**

560 Not applicable

561

## 562 **Competing interests**

563 The authors declare that they have no competing interests.

564

566 **Figure legends**

567 **Fig 1** Bio-climatic data analysis. **(A)** Loading plot of the PCA analysis. **(B)** Principal Component  
568 Analysis (PCA) of the bio-climatic data. Groups are colored according to the K-mean clustering  
569 analysis conducted in this study, which gave results very similar to the STRUCTURE analysis  
570 conducted by Ariani et al. (2018): MW1, MW2, and MW3: Mesoamerican wild gene pools; AW:  
571 Andean wild gene pool; PhI: Intermediate wild gene pool.

572 **Fig 2** Principal Component Analysis on SNP data. **(A)** Screeplot of the PCA explained variance.  
573 **(B)** PCA plot based on molecular data of the different genotyped analyzed in the current study.  
574 Groups are colored according to the K-mean clustering analysis conducted in this study, which  
575 gave results very similar to the STRUCTURE analysis conducted by Ariani et al. (2018): MW1,  
576 MW2, and MW3: Mesoamerican wild gene pools; AW: Andean wild gene pool; PhI:  
577 Intermediate wild gene pool.

578 **Fig 3** Three-dimensional plot of the PCA analysis on molecular data. Points are colored as in **Fig**  
579 **2B**.

580 **Fig 4** Manhattan plot of the genome scan data with 5 sub-populations (K). The blue dashed line  
581 represents the significance threshold (Bonferroni p-value  $\leq 0.001$ ).

582 **Fig 5** Chromosome ideogram of the genes identified as associated with the bio-climatic variables  
583 analyzed. Only chromosomes with significantly associated variants are shown. Each circle  
584 represents a different bio-climatic variable. When available, gene annotations are shown. The  
585 centromeric regions shown are based on the results from Sevilla et al. (2015).

586 **Fig 6** Allele frequency distribution across different genetic groups for candidate genes identified  
587 by genome scan analysis. *P. vulgaris* v1.0 genes annotation and ID: **(A)** Potassium uptake  
588 transporter (Phvul.002G331700); **(B)** Glycine-rich domain protein (Phvul.002G143100); **(C)**  
589 ABA response (Phvul.004G102800); **(D)** Chlorophyll biosynthesis and ABA signaling

590 (Phvul.008G161000); **(E)** ABA and drought response (Phvul.009G050600). For panel **(E)** the  
591 PhI group was removed because SNP data were completely missing. REF: Reference allele, in  
592 red, ALT: Alternative allele, according to the *P. vulgaris* v1.0 gene version, in blue (Sevilla et al.,  
593 2015).

594 **Fig 7** Allele frequency distribution across different genetic groups for candidate genes identified  
595 by association analysis. *P. vulgaris* v1.0 genes annotation and ID: **(A)** Potassium efflux antiporter  
596 (Phvul.001G034400); **(B)** Phospholipase D  $\alpha$  1 (Phvul.010G155000); **(C)** Cytokinin responsive  
597 factor (Phvul.010G035200); **(D)** Thioredoxin (Phvul.008G161700). Reference and Alternative  
598 alleles are colored as in **Fig 6**.

599

## 600 **Supporting information**

### 601 **Tables**

602 **S1 Table.** Candidate genes identified by genome scans.

603 **S2 Table.** Candidate genes identified by genome-wide association analysis.

604 **S3 Table.** Eigenvalues of the different bioclimatic variables along the first four principal  
605 components.

606 **S4 Table.** List of the final wild *Phaseolus vulgaris* analyzed in this study. Accession ID, country  
607 of origin, geographical coordinates of collection, and gene pool information are shown (from  
608 Ariani et al. 2018).

### 609 **Figures**

610 **S1 Fig.** Correlation graphs between bio-climatic variables for the different *P. vulgaris* accessions  
611 analyzed. Correlation coefficients are rendered using circles (upper-right part) or by showing  
612 directly the value (lower-left part). Color are based on color-bar in the right side of the graph.

613

614 **S2 Fig.** Cumulative variance explained by the different PCs when performing a PCA on bio-  
615 climatic variables.

616 **S3 Fig.** P-values distribution for genome scans with 2 (A), 3 (B), 4 (C) or 5 (D) sub-populations.

617 **S4 Fig.** Plot of geographic distribution of the wild *P. vulgaris* analyzed in the current studies.

618 Genotypes are colored based on the different clusters identified by K-means clustering (**Fig 1B,**  
619 **Fig. 2B, S4 Table**).

620 **S5 Fig.** Plots of the inflation factor for different values of K across the climatic variables  
621 selected for association study.

622 **REFERENCES**

- 623
- 624 1. Rippke U, Ramirez-Villegas J, Jarvis A, Vermeulen SJ, Parker L, Mer F, et al., Timescales of  
625 transformational climate change adaptation in sub-Saharan African agriculture. *Nature*  
626 *Climate Change*. 2016;6: 605–609. doi:10.1038/nclimate2947 W
- 627 2. Campbell BM, Vermeulen SJ, Aggarwal PK, Corner-Dolloff C, Girvetz E, Loboguerrero  
628 AM, et al., Reducing risks to food security from climate change. *Global Food Security*.  
629 2016;11: 34–43. doi:10.1016/j.gfs.2016.06.002
- 630 3. Wheeler T, Braun J von. *Climate Change Impacts on Global Food Security*. *Science*.  
631 2013;341: 508–513. doi:10.1126/science.1239402
- 632 4. Challinor AJ, Watson J, Lobell DB, Howden SM, Smith DR, Chhetri N. A meta-analysis of  
633 crop yield under climate change and adaptation. *Nature Climate Change*. 2014;4: 287–291.  
634 doi:10.1038/nclimate2153
- 635 5. Lobell DB, Burke MB, Tebaldi C, Mastrandrea MD, Falcon WP, Naylor RL. Prioritizing  
636 Climate Change Adaptation Needs for Food Security in 2030. *Science*. 2008;319: 607–610.  
637 doi:10.1126/science.1152339
- 638 6. Field CB, Barros V, Stocker TF, Dahe Q, editors. *Managing the Risks of Extreme Events*  
639 *and Disasters to Advance Climate Change Adaptation: Special Report of the*  
640 *Intergovernmental Panel on Climate Change (Internet)*. Cambridge: Cambridge University  
641 Press; 2012. doi:10.1017/CBO9781139177245
- 642 7. Ford-Lloyd BV, Schmidt M, Armstrong SJ, Barazani O, Engels J, Hadas R, et al., *Crop*  
643 *Wild Relatives—Undervalued, Underutilized and under Threat?* *BioScience*. 2011;61: 559–  
644 565. doi:10.1525/bio.2011.61.7.10
- 645 8. Zamir D. Improving plant breeding with exotic genetic libraries. *Nat Rev Genet*. 2001;2:  
646 983–989. doi:10.1038/35103589
- 647 9. Gepts P. The contribution of genetic and genomic approaches to plant domestication  
648 studies. *Curr Opin Plant Biol*. 2014;18: 51–59. doi:10.1016/j.pbi.2014.02.001
- 649 10. Spillane C, Gepts P. Evolutionary and genetic perspectives on the dynamics of crop  
650 gene pools. 2001; Available: [http://agris.fao.org/agris-](http://agris.fao.org/agris-search/search.do?recordID=XF2003411459)  
651 [search/search.do?recordID=XF2003411459](http://agris.fao.org/agris-search/search.do?recordID=XF2003411459)
- 652 11. Brozynska M, Furtado A, Henry RJ. Genomics of crop wild relatives: expanding the gene  
653 pool for crop improvement. *Plant Biotechnol J*. 2016;14: 1070–1085. doi:10.1111/pbi.12454
- 654 12. Cortés AJ, Monserrate FA, Ramírez-Villegas J, Madriñán S, Blair MW. Drought tolerance  
655 in wild plant populations: the case of common beans (*Phaseolus vulgaris* L.). *PLoS ONE*.  
656 2013;8: e62898. doi:10.1371/journal.pone.0062898

- 657 13. Zhang H, Mittal N, Leamy LJ, Barazani O, Song B-H. Back into the wild-Apply untapped  
658 genetic diversity of wild relatives for crop improvement. *Evol Appl.* 2017;10: 5–24.  
659 doi:10.1111/eva.12434
- 660 14. Schoville SD, Bonin A, François O, Lobreaux S, Melodelima C, Manel S. Adaptive Genetic  
661 Variation on the Landscape: Methods and Cases. *Annual Review of Ecology, Evolution,*  
662 *and Systematics.* 2012;43: 23–43. doi:10.1146/annurev-ecolsys-110411-160248
- 663 15. Bragg JG, Supple MA, Andrew RL, Borevitz JO. Genomic variation across landscapes:  
664 insights and applications. *New Phytol.* 2015;207: 953–967. doi:10.1111/nph.13410
- 665 16. Anderson JE, Kono TJY, Stupar RM, Kantar MB, Morrell PL. Environmental Association  
666 Analyses Identify Candidates for Abiotic Stress Tolerance in Glycine soja, the Wild  
667 Progenitor of Cultivated Soybeans. *G3 (Bethesda).* 2016;6: 835–843.  
668 doi:10.1534/g3.116.026914
- 669 17. Wagner HH, Fortin M-J. A conceptual framework for the spatial analysis of landscape  
670 genetic data. *Conserv Genet.* 2013;14: 253–261. doi:10.1007/s10592-012-0391-5
- 671 18. Wright S. The Genetical Structure of Populations. *Annals of Eugenics.* 1949;15: 323–354.  
672 doi:10.1111/j.1469-1809.1949.tb02451.x
- 673 19. Lewontin RC, Krakauer J. Distribution of gene frequency as a test of the theory of the  
674 selective neutrality of polymorphisms. *Genetics.* 1973;74: 175–195.
- 675 20. Haldane JBS. A mathematical theory of natural and artificial selection. (Part VI, Isolation.).  
676 *Mathematical Proceedings of the Cambridge Philosophical Society.* 1930;26: 220–230.  
677 doi:10.1017/S0305004100015450
- 678 21. Kimura M. On the probability of fixation of mutant genes in a population. *Genetics.*  
679 1962;47: 713–719.
- 680 22. Narum SR, Hess JE. Comparison of  $F_{ST}$  outlier tests for SNP loci under selection. *Mol*  
681 *Ecol Resour.* 2011;11 Suppl 1: 184–194. doi:10.1111/j.1755-0998.2011.02987.x
- 682 23. Manel S, Joost S, Epperson BK, Holderegger R, Storfer A, Rosenberg MS, et al.,  
683 Perspectives on the use of landscape genetics to detect genetic adaptive variation in the  
684 field. *Mol Ecol.* 2010;19: 3760–3772. doi:10.1111/j.1365-294X.2010.04717.x
- 685 24. Hirschhorn JN, Daly MJ. Genome-wide association studies for common diseases and  
686 complex traits. *Nat Rev Genet.* 2005;6: 95–108. doi:10.1038/nrg1521
- 687 25. Lipka AE, Kandianis CB, Hudson ME, Yu J, Drnevich J, Bradbury PJ, et al., From  
688 association to prediction: statistical methods for the dissection and selection of complex  
689 traits in plants. *Current Opinion in Plant Biology.* 2015;24: 110–118.  
690 doi:10.1016/j.pbi.2015.02.010

- 691 26. Gepts P, Aragão FJL, Barros E de, Blair MW, Brondani R, Broughton W, et al., Genomics  
692 of Phaseolus Beans, a Major Source of Dietary Protein and Micronutrients in the Tropics.  
693 In: Moore PH, Ming R, editors. Genomics of Tropical Crop Plants. New York, NY:  
694 Springer New York; 2008. pp. 113–143. doi:10.1007/978-0-387-71219-2\_5
- 695 27. Messina V. Nutritional and health benefits of dried beans. Am J Clin Nutr. 2014;100 Suppl  
696 1: 437S–42S. doi:10.3945/ajcn.113.071472
- 697 28. Rubiales D, Mikic A. Introduction: Legumes in Sustainable Agriculture. Critical Reviews in  
698 Plant Sciences. 2015;34: 2–3. doi:10.1080/07352689.2014.897896
- 699 29. Chacón S. MI, Pickersgill B, Debouck DG, Arias JS. Phylogeographic analysis of the  
700 chloroplast DNA variation in wild common bean (*Phaseolus vulgaris* L.) in the Americas.  
701 Plant Syst Evol. 2007;266: 175–195. doi:10.1007/s00606-007-0536-z
- 702 30. Koenig R, Gepts P. Allozyme diversity in wild *Phaseolus vulgaris*: further evidence for two  
703 major centers of genetic diversity. Theor Appl Genet. 1989;78: 809–817.  
704 doi:10.1007/BF00266663
- 705 31. Mamidi S, Rossi M, Moghaddam SM, Annam D, Lee R, Papa R, et al., Demographic  
706 factors shaped diversity in the two gene pools of wild common bean *Phaseolus vulgaris* L.  
707 Heredity (Edinb). 2013;110: 267–276. doi:10.1038/hdy.2012.82
- 708 32. Bitocchi E, Bellucci E, Giardini A, Rau D, Rodriguez M, Biagetti E, et al., Molecular  
709 analysis of the parallel domestication of the common bean (*Phaseolus vulgaris*) in  
710 Mesoamerica and the Andes. New Phytol. 2013;197: 300–313. doi:10.1111/j.1469-  
711 8137.2012.04377.x
- 712 33. Blair MW, Soler A, Cortés AJ. Diversification and population structure in common beans  
713 (*Phaseolus vulgaris* L.). PLoS ONE. 2012;7: e49488. doi:10.1371/journal.pone.0049488
- 714 34. Chacón S MI, Pickersgill B, Debouck DG. Domestication patterns in common bean  
715 (*Phaseolus vulgaris* L.) and the origin of the Mesoamerican and Andean cultivated races.  
716 Theor Appl Genet. 2005;110: 432–444. doi:10.1007/s00122-004-1842-2
- 717 35. Gepts P, Osborn TC, Rashka K, Bliss FA. Phaseolin-protein Variability in Wild Forms and  
718 Landraces of the Common Bean(*Phaseolus vulgaris*): Evidence for Multiple Centers of  
719 Domestication. Econ Bot. 1986;40: 451–468. doi:10.1007/BF02859659
- 720 36. Mamidi S. Investigation of the domestication of common bean (*Phaseolus vulgaris*) using  
721 multilocus sequence data. Functional plant biology. 2011;v. 38: 953–967.  
722 doi:10.1071/FP11124
- 723 37. Rossi M, Bitocchi E, Bellucci E, Nanni L, Rau D, Attene G, et al., Linkage disequilibrium  
724 and population structure in wild and domesticated populations of *Phaseolus vulgaris* L. Evol  
725 Appl. 2009;2: 504–522. doi:10.1111/j.1752-4571.2009.00082.x



- 726 38. Singh SP, Gepts P, Debouck DG. Races of common bean (*Phaseolus vulgaris*, Fabaceae).  
727 Econ Bot. 1991;45: 379–396. doi:10.1007/BF02887079
- 728 39. Debouck DG, Toro O, Paredes OM, Johnson WC, Gepts P. Genetic diversity and ecological  
729 distribution of *Phaseolus vulgaris* (Fabaceae) in northwestern South America. Econ Bot.  
730 1993;47: 408–423. doi:10.1007/BF02907356
- 731 40. Kami J, Velásquez VB, Debouck DG, Gepts P. Identification of presumed ancestral DNA  
732 sequences of phaseolin in *Phaseolus vulgaris*. PNAS. 1995;92: 1101–1104.  
733 doi:10.1073/pnas.92.4.1101
- 734 41. Rendón-Anaya M, Herrera-Estrella A, Gepts P, Delgado-Salinas A. A new species of  
735 *Phaseolus* (Leguminosae, Papilionoideae) sister to *Phaseolus vulgaris*, the common bean.  
736 Phytotaxa. 2017;313: 259–266. doi:10.11646/phytotaxa.313.3.3
- 737 42. Rendón-Anaya M, Montero-Vargas JM, Saburido-Álvarez S, Vlasova A, Capella-Gutierrez  
738 S, Ordaz-Ortiz JJ, et al., Genomic history of the origin and domestication of common bean  
739 unveils its closest sister species. Genome Biol. 2017;18: 60. doi:10.1186/s13059-017-1190-  
740 6
- 741 43. Gepts P. Origin and Evolution of Common Bean: Past Events and Recent Trends.  
742 HortScience. 1998;33: 1124–1130.
- 743 44. Porch T, Beaver J, Debouck D, Jackson S, Kelly J, Dempewolf H, et al., Use of Wild  
744 Relatives and Closely Related Species to Adapt Common Bean to Climate Change.  
745 Agronomy. 2013;3: 433–461. doi:10.3390/agronomy3020433
- 746 45. Acosta-Gallegos JA, Kelly JD, Gepts P. Prebreeding in Common Bean and Use of Genetic  
747 Diversity from Wild Germplasm. Crop Science. 2007;47: S-44-S-59.  
748 doi:10.2135/cropsci2007.04.0008IPBS
- 749 46. Ramirez-Cabral NYZ, Kumar L, Taylor S. Crop niche modeling projects major shifts in  
750 common bean growing areas. Agricultural and Forest Meteorology. 2016;218–219: 102–  
751 113. doi:10.1016/j.agrformet.2015.12.002
- 752 47. Westengen OT, Berg PR, Kent MP, Brysting AK. Spatial structure and climatic adaptation  
753 in African maize revealed by surveying SNP diversity in relation to global breeding and  
754 landrace panels. PLoS ONE. 2012;7: e47832. doi:10.1371/journal.pone.0047832
- 755 48. Yoder JB, Stanton-Geddes J, Zhou P, Briskine R, Young ND, Tiffin P. Genomic signature  
756 of adaptation to climate in *Medicago truncatula*. Genetics. 2014;196: 1263–1275.  
757 doi:10.1534/genetics.113.159319
- 758 49. Dell'Acqua M, Zuccolo A, Tuna M, Gianfranceschi L, Pè ME. Targeting environmental  
759 adaptation in the monocot model *Brachypodium distachyon*: a multi-faceted approach.  
760 BMC Genomics. 2014;15. doi:10.1186/1471-2164-15-801

- 761 50. Abebe TD, Naz AA, Léon J. Landscape genomics reveal signatures of local adaptation in  
762 barley (*Hordeum vulgare* L.). *Front Plant Sci.* 2015;6: 813. doi:10.3389/fpls.2015.00813
- 763 51. Ariani A, Berny Mier Y Teran JC, Gepts P. Spatial and temporal scales of range expansion  
764 in wild *Phaseolus vulgaris*. *Mol Biol Evol.* 2018;35: 119–131. doi:10.1093/molbev/msx273
- 765 52. Rodriguez M, Rau D, Bitocchi E, Bellucci E, Biagetti E, Carboni A, et al., Landscape  
766 genetics, adaptive diversity and population structure in *Phaseolus vulgaris*. *New Phytol.*  
767 2016;209: 1781–1794. doi:10.1111/nph.13713
- 768 53. Wehrens R. *Chemometrics with R: Multivariate data analysis in the natural sciences and life*  
769 *sciences (internet)*. Berlin Heidelberg: Springer-Verlag; 2011. Available:  
770 //www.springer.com/us/book/9783642178405
- 771 54. Luu K, Bazin E, Blum MGB. pcadapt: an R package to perform genome scans for selection  
772 based on principal component analysis. *Mol Ecol Resour.* 2017;17: 67–77.  
773 doi:10.1111/1755-0998.12592
- 774 55. Frichot E, Schoville SD, Bouchard G, François O. Testing for associations between loci and  
775 environmental gradients using latent factor mixed models. *Mol Biol Evol.* 2013;30: 1687–  
776 1699. doi:10.1093/molbev/mst063
- 777 56. Frichot E, François O. LEA: An R package for landscape and ecological association studies.  
778 *Methods in Ecology and Evolution.* 2015;6: 925–929. doi:10.1111/2041-210X.12382
- 779 57. Devlin B, Roeder K. Genomic control for association studies. *Biometrics.* 1999;55: 997–  
780 1004.
- 781 58. Schmutz J, McClean PE, Mamidi S, Wu GA, Cannon SB, Grimwood J, et al., A reference  
782 genome for common bean and genome-wide analysis of dual domestications. *Nat Genet.*  
783 2014;46: 707–713. doi:10.1038/ng.3008
- 784 59. Lawrence M, Gentleman R, Carey V. rtracklayer: an R package for interfacing with genome  
785 browsers. *Bioinformatics.* 2009;25: 1841–1842. doi:10.1093/bioinformatics/btp328
- 786 60. Lawrence M, Huber W, Pagès H, Aboyoun P, Carlson M, Gentleman R, et al., Software for  
787 computing and annotating genomic ranges. *PLoS Comput Biol.* 2013;9: e1003118.  
788 doi:10.1371/journal.pcbi.1003118
- 789 61. Li X, Zhu C, Yeh C-T, Wu W, Takacs EM, Petsch KA, et al., Genic and nongenic  
790 contributions to natural variation of quantitative traits in maize. *Genome Res.* 2012;22:  
791 2436–2444. doi:10.1101/gr.140277.112
- 792 62. Purcell S, Neale B, Todd-Brown K, Thomas L, Ferreira MAR, Bender D, et al., PLINK: A  
793 Tool Set for Whole-Genome Association and Population-Based Linkage Analyses. *Am J*  
794 *Hum Genet.* 2007;81: 559–575.

- 795 63. Camacho C, Coulouris G, Avagyan V, Ma N, Papadopoulos J, Bealer K, et al., BLAST+:  
796 architecture and applications. BMC Bioinformatics. 2009;10: 421. doi:10.1186/1471-2105-  
797 10-421
- 798 64. Pedregosa F, Varoquaux G, Gramfort A, Michel V, Thirion B, Grisel O, et al., Scikit-learn:  
799 Machine Learning in Python. Journal of Machine Learning Research. 2011;12: 2825–2830.
- 800 65. Danecek P, Auton A, Abecasis G, Albers CA, Banks E, DePristo MA, et al., The variant  
801 call format and VCFtools. Bioinformatics. 2011;27: 2156–2158.  
802 doi:10.1093/bioinformatics/btr330
- 803 66. Bitocchi E, Nanni L, Bellucci E, Rossi M, Giardini A, Zeuli PS, et al., Mesoamerican origin  
804 of the common bean (*Phaseolus vulgaris* L.) is revealed by sequence data. Proc Natl Acad  
805 Sci USA. 2012;109: E788-796. doi:10.1073/pnas.1108973109
- 806 67. Kwak M, Gepts P. Structure of genetic diversity in the two major gene pools of common  
807 bean (*Phaseolus vulgaris* L., Fabaceae). Theor Appl Genet. 2009;118: 979–992.  
808 doi:10.1007/s00122-008-0955-4
- 809 68. Osakabe Y, Arinaga N, Umezawa T, Katsura S, Nagamachi K, Tanaka H, et al., Osmotic  
810 stress responses and plant growth controlled by potassium transporters in *Arabidopsis*. Plant  
811 Cell. 2013;25: 609–624. doi:10.1105/tpc.112.105700
- 812 69. Bellucci E, Bitocchi E, Ferrarini A, Benazzo A, Biagetti E, Klie S, et al., Decreased  
813 Nucleotide and Expression Diversity and Modified Coexpression Patterns Characterize  
814 Domestication in the Common Bean[W](OPEN). Plant Cell. 2014;26: 1901–1912.  
815 doi:10.1105/tpc.114.124040
- 816 70. Bitocchi E, Rau D, Bellucci E, Rodriguez M, Murgia ML, Gioia T, et al., Beans (*Phaseolus*  
817 *ssp.*) as a Model for Understanding Crop Evolution. Front Plant Sci. 2017;8: 722.  
818 doi:10.3389/fpls.2017.00722
- 819 71. Geiger D, Maierhofer T, Al-Rasheid KAS, Scherzer S, Mumm P, Liese A, et al., Stomatal  
820 closure by fast abscisic acid signaling is mediated by the guard cell anion channel SLAH3  
821 and the receptor RCAR1. Sci Signal. 2011;4: ra32. doi:10.1126/scisignal.2001346
- 822 72. Zhang A, Ren H-M, Tan Y-Q, Qi G-N, Yao F-Y, Wu G-L, et al., S-type Anion Channels  
823 SLAC1 and SLAH3 Function as Essential Negative Regulators of Inward K<sup>+</sup> Channels and  
824 Stomatal Opening in *Arabidopsis*. Plant Cell. 2016;28: 949–955. doi:10.1105/tpc.16.01050
- 825 73. Cubero-Font P, Maierhofer T, Jaslan J, Rosales MA, Espartero J, Díaz-Rueda P, et al.,  
826 Silent S-Type Anion Channel Subunit SLAH1 Gates SLAH3 Open for Chloride Root-to-  
827 Shoot Translocation. Curr Biol. 2016;26: 2213–2220. doi:10.1016/j.cub.2016.06.045
- 828 74. Espineda CE, Linford AS, Devine D, Brusslan JA. The AtCAO gene, encoding chlorophyll  
829 a oxygenase, is required for chlorophyll b synthesis in *Arabidopsis thaliana*. Proc Natl Acad  
830 Sci USA. 1999;96: 10507–10511.

- 831 75. Jahan MS, Nozulaidi M, Khairi M, Mat N. Light-harvesting complexes in photosystem II  
832 regulate glutathione-induced sensitivity of Arabidopsis guard cells to abscisic acid. *J Plant*  
833 *Physiol.* 2016;195: 1–8. doi:10.1016/j.jplph.2016.03.002
- 834 76. Sachetto-Martins G, Franco LO, de Oliveira DE. Plant glycine-rich proteins: a family or just  
835 proteins with a common motif? *Biochim Biophys Acta.* 2000;1492: 1–14.
- 836 77. Mangeon A, Junqueira RM, Sachetto-Martins G. Functional diversity of the plant glycine-  
837 rich proteins superfamily. *Plant Signal Behav.* 2010;5: 99–104.
- 838 78. Ortega-Amaro MA, Rodríguez-Hernández AA, Rodríguez-Kessler M, Hernández-Lucero E,  
839 Rosales-Mendoza S, Ibáñez-Salazar A, et al., Overexpression of AtGRDP2, a novel glycine-  
840 rich domain protein, accelerates plant growth and improves stress tolerance. *Front Plant Sci.*  
841 2014;5: 782. doi:10.3389/fpls.2014.00782
- 842 79. Merkle T. Nucleo-cytoplasmic partitioning of proteins in plants: implications for the  
843 regulation of environmental and developmental signalling. *Curr Genet.* 2003;44: 231–260.  
844 doi:10.1007/s00294-003-0444-x
- 845 80. Luo Y, Wang Z, Ji H, Fang H, Wang S, Tian L, et al., An Arabidopsis homolog of importin  
846  $\beta$ 1 is required for ABA response and drought tolerance. *Plant J.* 2013;75: 377–389.  
847 doi:10.1111/tpj.12207
- 848 81. Shabala S. Regulation of Potassium Transport in Leaves: from Molecular to Tissue Level.  
849 *Ann Bot.* 2003;92: 627–634. doi:10.1093/aob/mcg191
- 850 82. Sharma T, Dreyer I, Riedelsberger J. The role of K<sup>+</sup> channels in uptake and redistribution of  
851 potassium in the model plant Arabidopsis thaliana. *Front Plant Sci.* 2013;4.  
852 doi:10.3389/fpls.2013.00224
- 853 83. Shabala S, Pottosin I. Regulation of potassium transport in plants under hostile conditions:  
854 implications for abiotic and biotic stress tolerance. *Physiol Plant.* 2014;151: 257–279.  
855 doi:10.1111/ppl.12165
- 856 84. Saucedo-García M, Gavilanes-Ruíz M, Arce-Cervantes O. Long-chain bases, phosphatidic  
857 acid, MAPKs, and reactive oxygen species as nodal signal transducers in stress responses in  
858 Arabidopsis. *Front Plant Sci.* 2015;6: 55. doi:10.3389/fpls.2015.00055
- 859 85. Zhang W, Qin C, Zhao J, Wang X. Phospholipase D $\alpha$ 1-derived phosphatidic acid interacts  
860 with ABI1 phosphatase 2C and regulates abscisic acid signaling. *Proc Natl Acad Sci U S A.*  
861 2004;101: 9508–9513. doi:10.1073/pnas.0402112101
- 862 86. Qu Y, An Z, Zhuang B, Jing W, Zhang Q, Zhang W. Copper amine oxidase and  
863 phospholipase D act independently in abscisic acid (ABA)-induced stomatal closure in  
864 *Vicia faba* and Arabidopsis. *J Plant Res.* 2014;127: 533–544. doi:10.1007/s10265-014-  
865 0633-3

- 866 87. Durán-Medina Y, Díaz-Ramírez D, Marsch-Martínez N. Cytokinins on the Move. *Front*  
867 *Plant Sci.* 2017;8: 146. doi:10.3389/fpls.2017.00146
- 868 88. Kieber JJ, Schaller GE. Cytokinins. *Arabidopsis Book.* 2014;12: e0168.  
869 doi:10.1199/tab.0168
- 870 89. Novakova M, Dobrev P, Motyka V, Gaudinova A, Malbeck J, Pospisilova J, et al.,  
871 Cytokinin Function in Drought Stress Response and Subsequent Recovery. In: Xu Z, Li J,  
872 Xue Y, Yang W, editors. *Biotechnology and Sustainable Agriculture 2006 and Beyond.*  
873 Springer Netherlands; 2007. pp. 171–174.
- 874 90. O’Brien JA, Benková E. Cytokinin cross-talking during biotic and abiotic stress responses.  
875 *Front Plant Sci.* 2013;4: 451. doi:10.3389/fpls.2013.00451
- 876 91. Kim J. CYTOKININ RESPONSE FACTORs Gating Environmental Signals and Hormones.  
877 *Trends Plant Sci.* 2016;21: 993–996. doi:10.1016/j.tplants.2016.10.004
- 878 92. Rashotte AM, Goertzen LR. The CRF domain defines cytokinin response factor proteins in  
879 plants. *BMC Plant Biol.* 2010;10: 74. doi:10.1186/1471-2229-10-74
- 880 93. Zwack PJ, Compton MA, Adams CI, Rashotte AM. Cytokinin response factor 4 (CRF4) is  
881 induced by cold and involved in freezing tolerance. *Plant Cell Rep.* 2016;35: 573–584.  
882 doi:10.1007/s00299-015-1904-8
- 883 94. Gelhaye E, Rouhier N, Navrot N, Jacquot JP. The plant thioredoxin system. *Cell Mol Life*  
884 *Sci.* 2005;62: 24–35. doi:10.1007/s00018-004-4296-4
- 885 95. D’Autréaux B, Toledano MB. ROS as signalling molecules: mechanisms that generate  
886 specificity in ROS homeostasis. *Nat Rev Mol Cell Biol.* 2007;8: 813–824.  
887 doi:10.1038/nrm2256
- 888 96. Sewelam N, Kazan K, Schenk PM. Global Plant Stress Signaling: Reactive Oxygen Species  
889 at the Cross-Road. *Front Plant Sci.* 2016;7. doi:10.3389/fpls.2016.00187
- 890 97. Sevilla F, Camejo D, Ortiz-Espín A, Calderón A, Lázaro JJ, Jiménez A. The  
891 thioredoxin/peroxiredoxin/sulfiredoxin system: current overview on its redox function in  
892 plants and regulation by reactive oxygen and nitrogen species. *J Exp Bot.* 2015;66: 2945–  
893 2955. doi:10.1093/jxb/erv146
- 894 98. Hermisson J, Pennings PS. Soft sweeps: molecular population genetics of adaptation from  
895 standing genetic variation. *Genetics.* 2005;169: 2335–2352.  
896 doi:10.1534/genetics.104.036947
- 897 99. Pyhäjärvi T, Hufford MB, Mezouk S, Ross-Ibarra J. Complex patterns of local adaptation  
898 in teosinte. *Genome Biol Evol.* 2013;5: 1594–1609. doi:10.1093/gbe/evt109

899 100. Cortés AJ, Blair MW. Genotyping by Sequencing and Genome–Environment Associations  
900 in Wild Common Bean Predict Widespread Divergent Adaptation to Drought. *Front Plant*  
901 *Sci.* 2018;9. doi:10.3389/fpls.2018.00128

902

**A**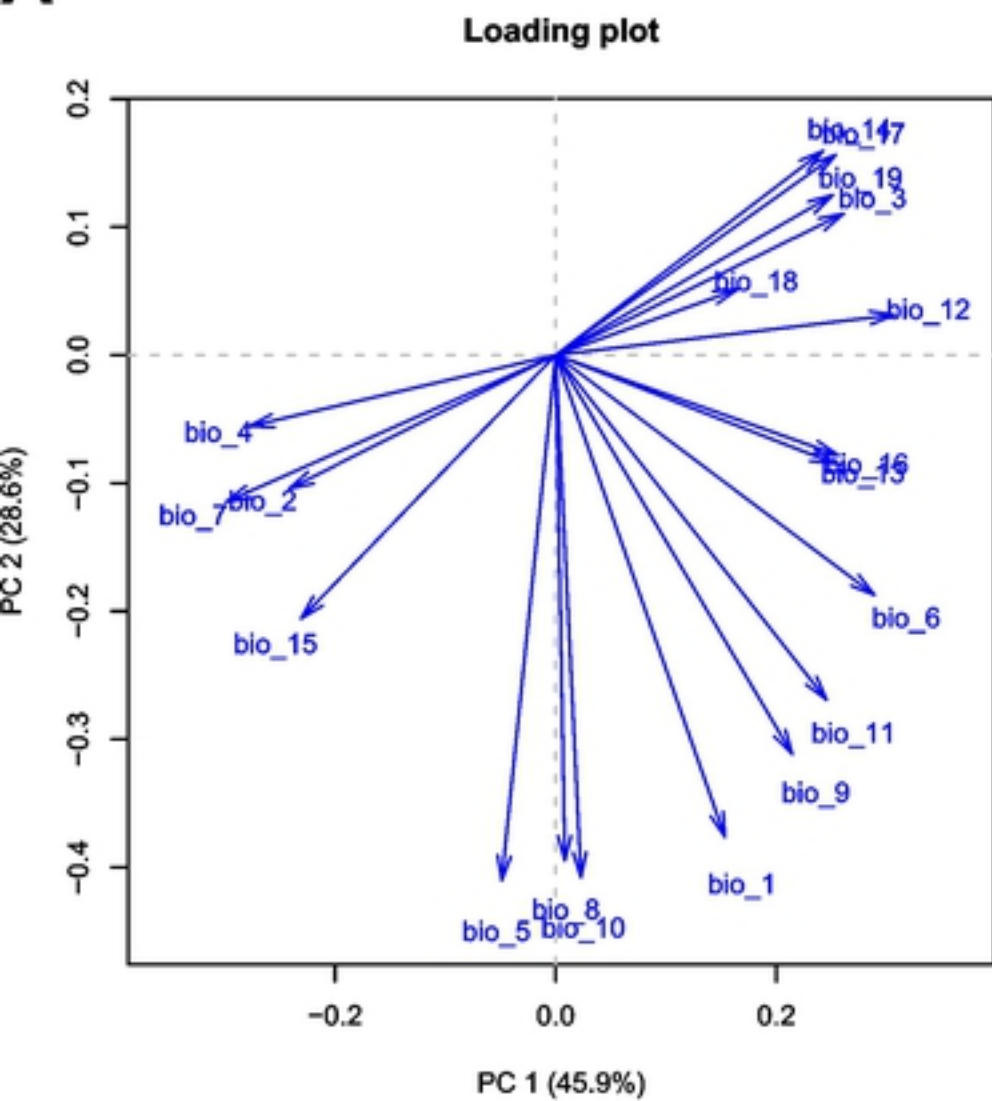**B**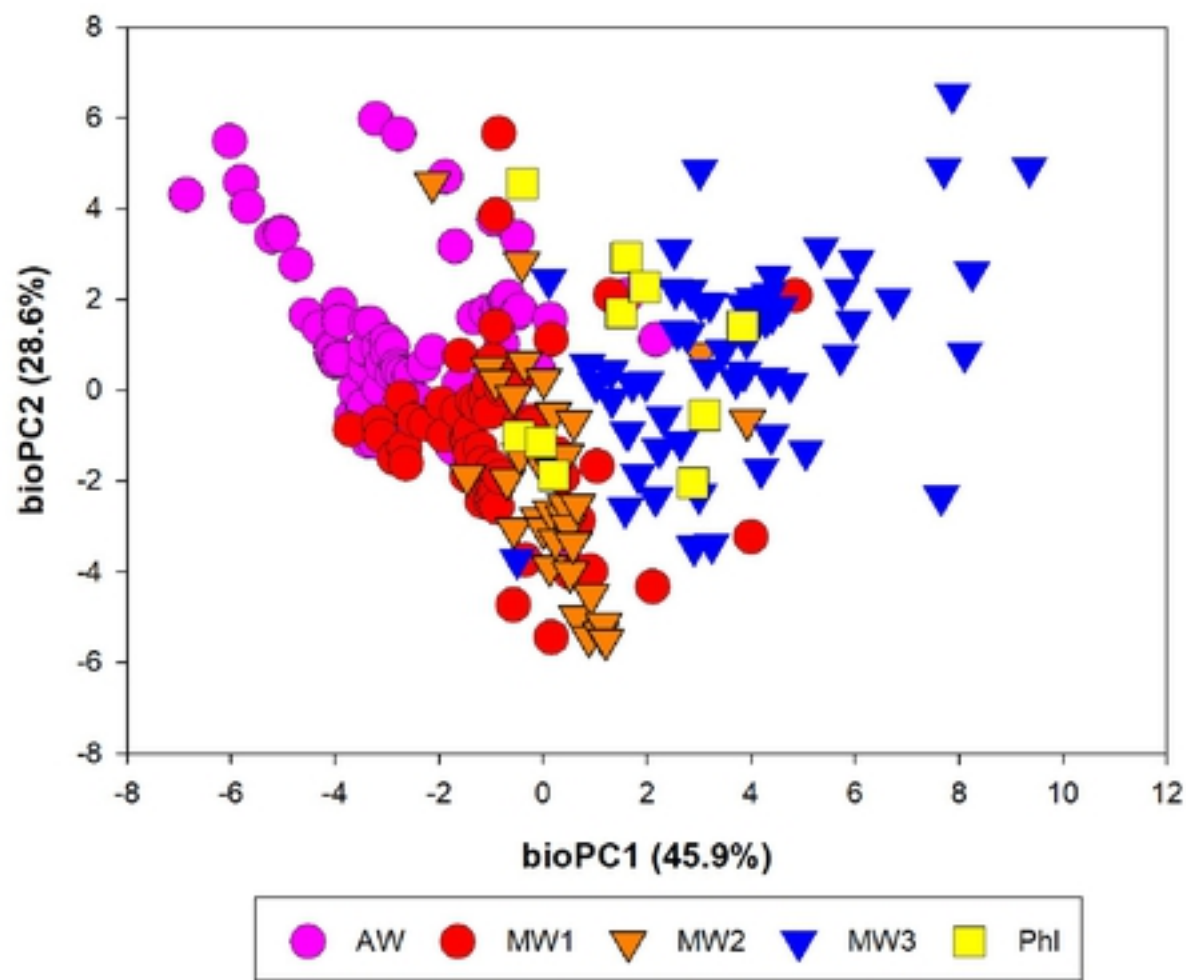

Figure 1

**A**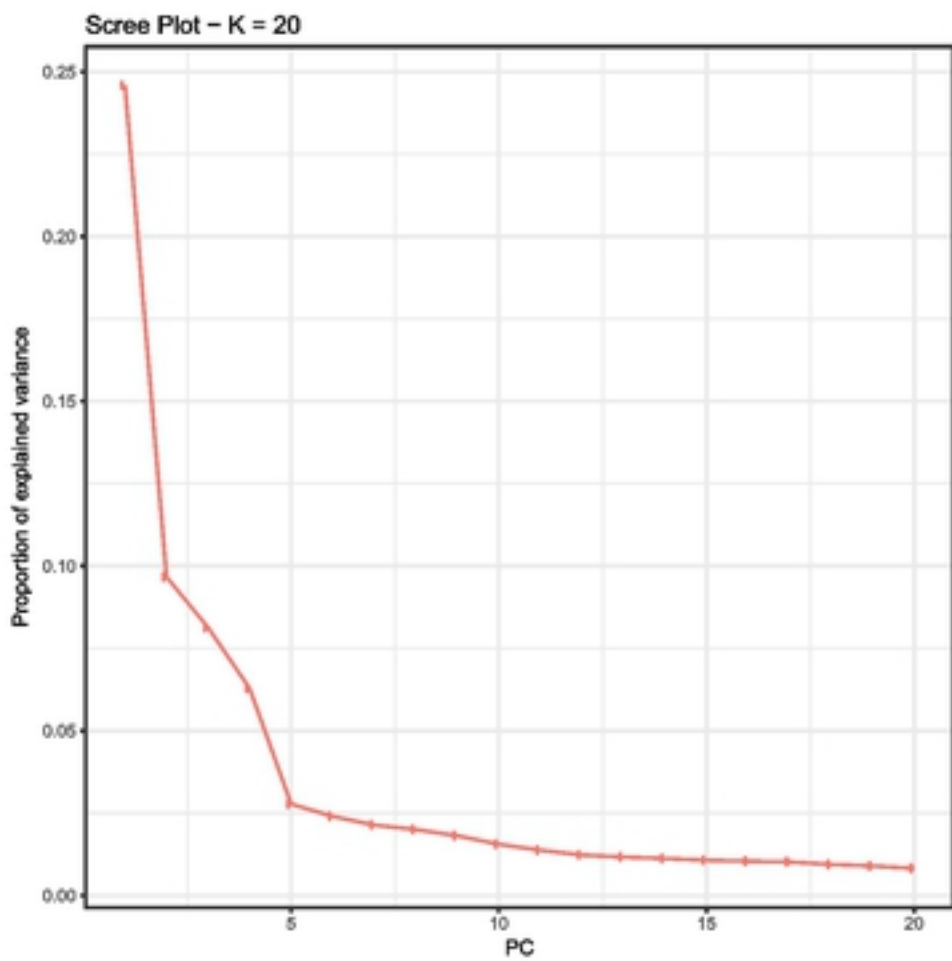**B**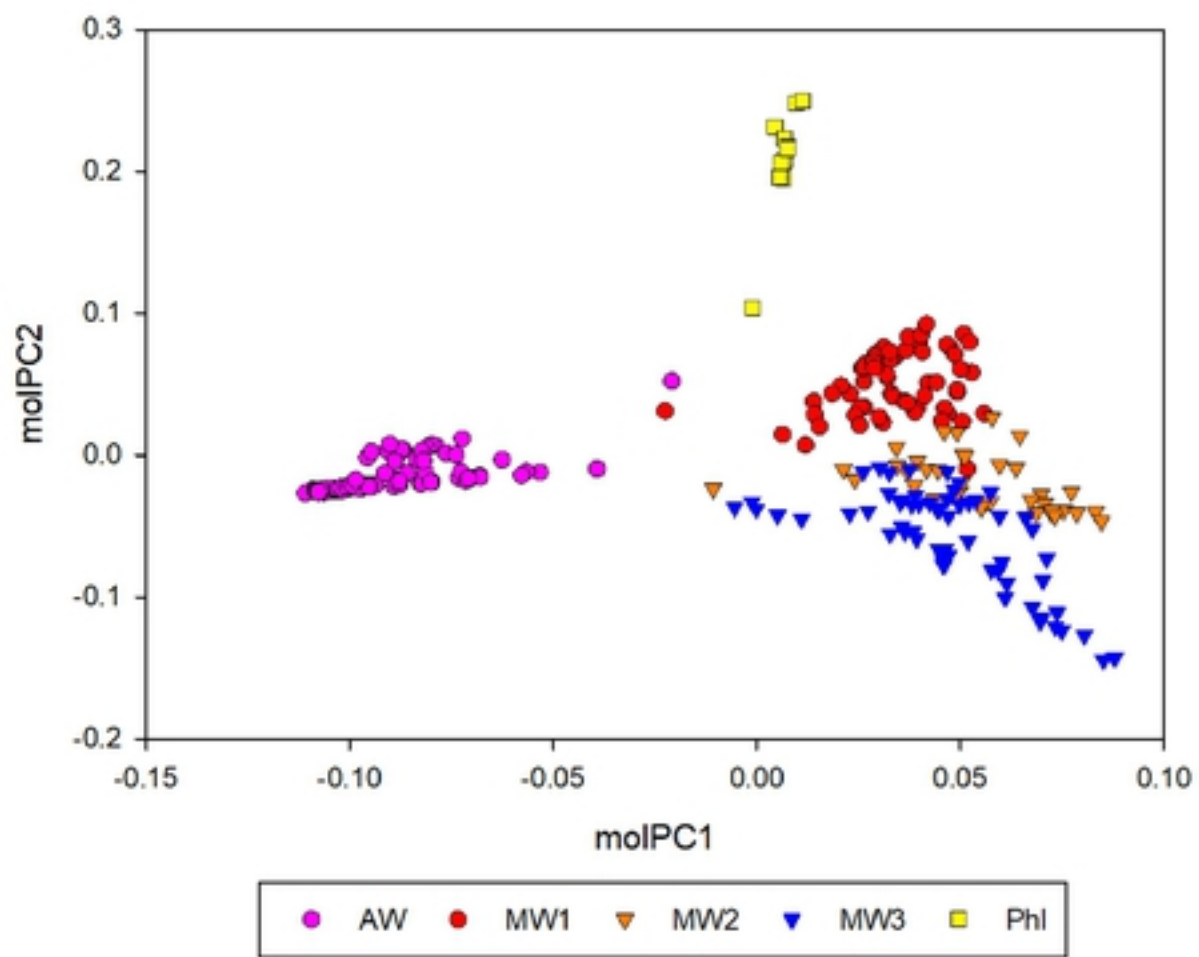

Figure 2



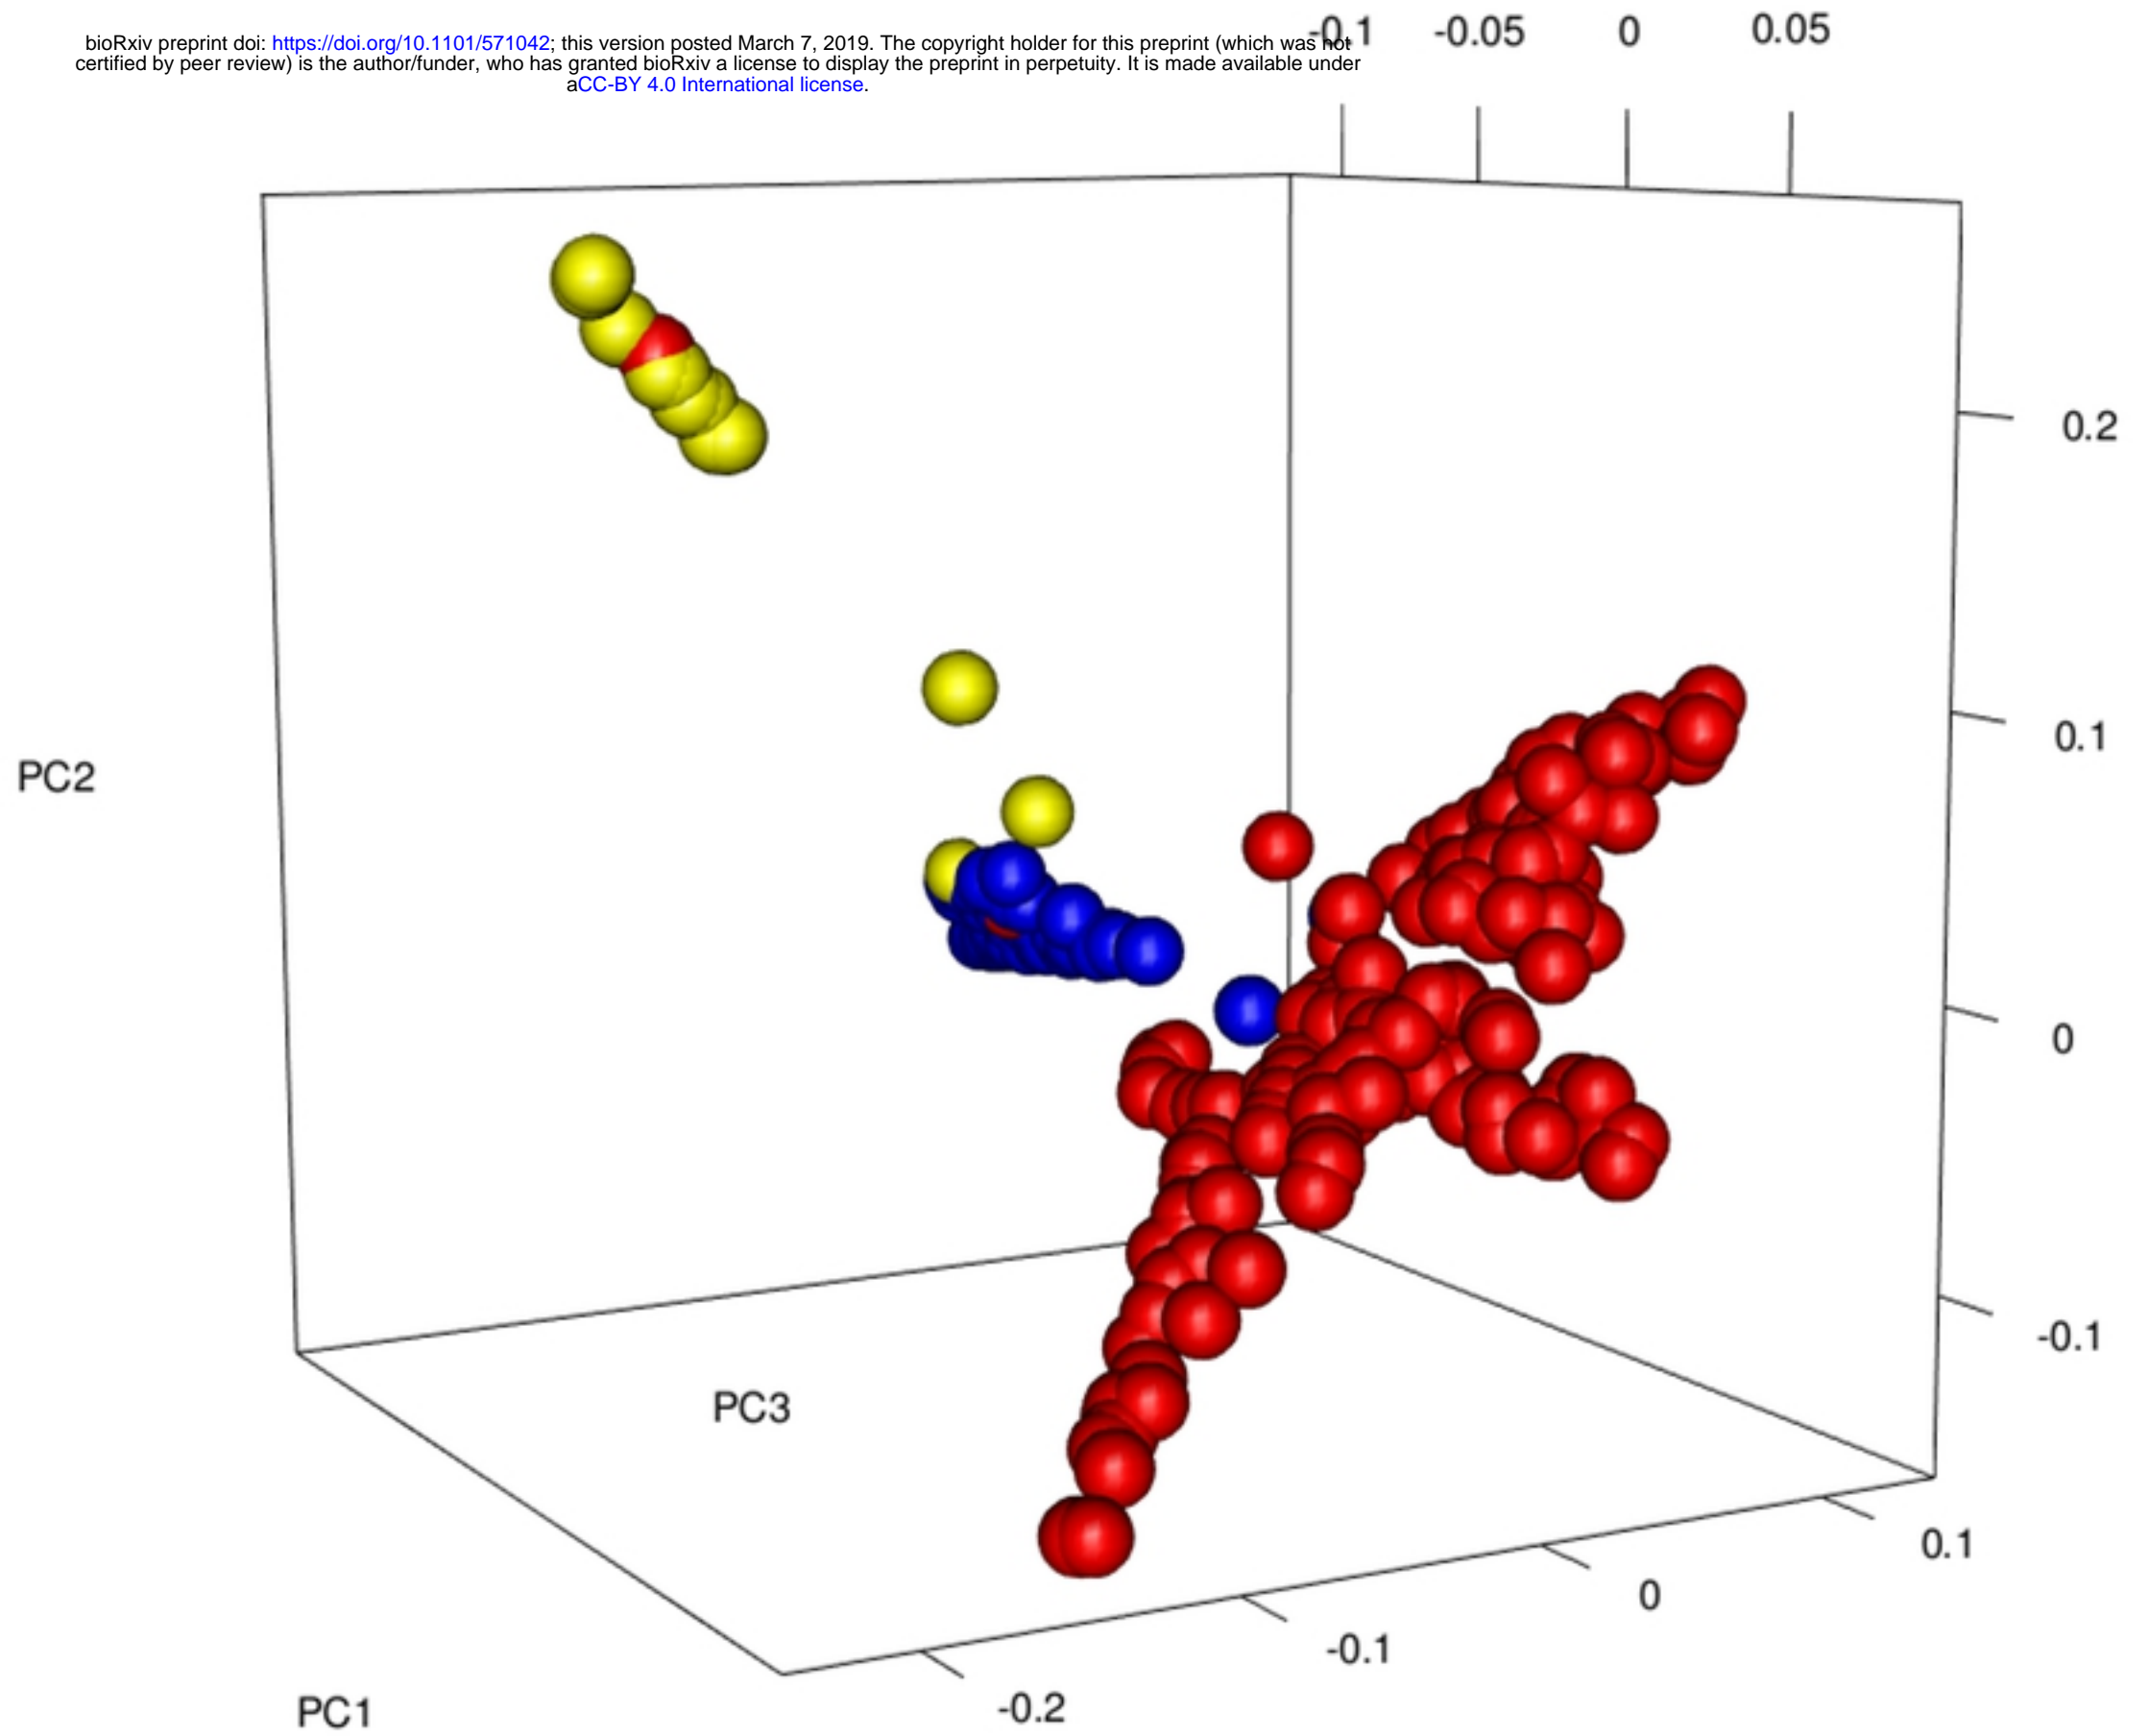

Figure 3

## Genome scan (K=5)

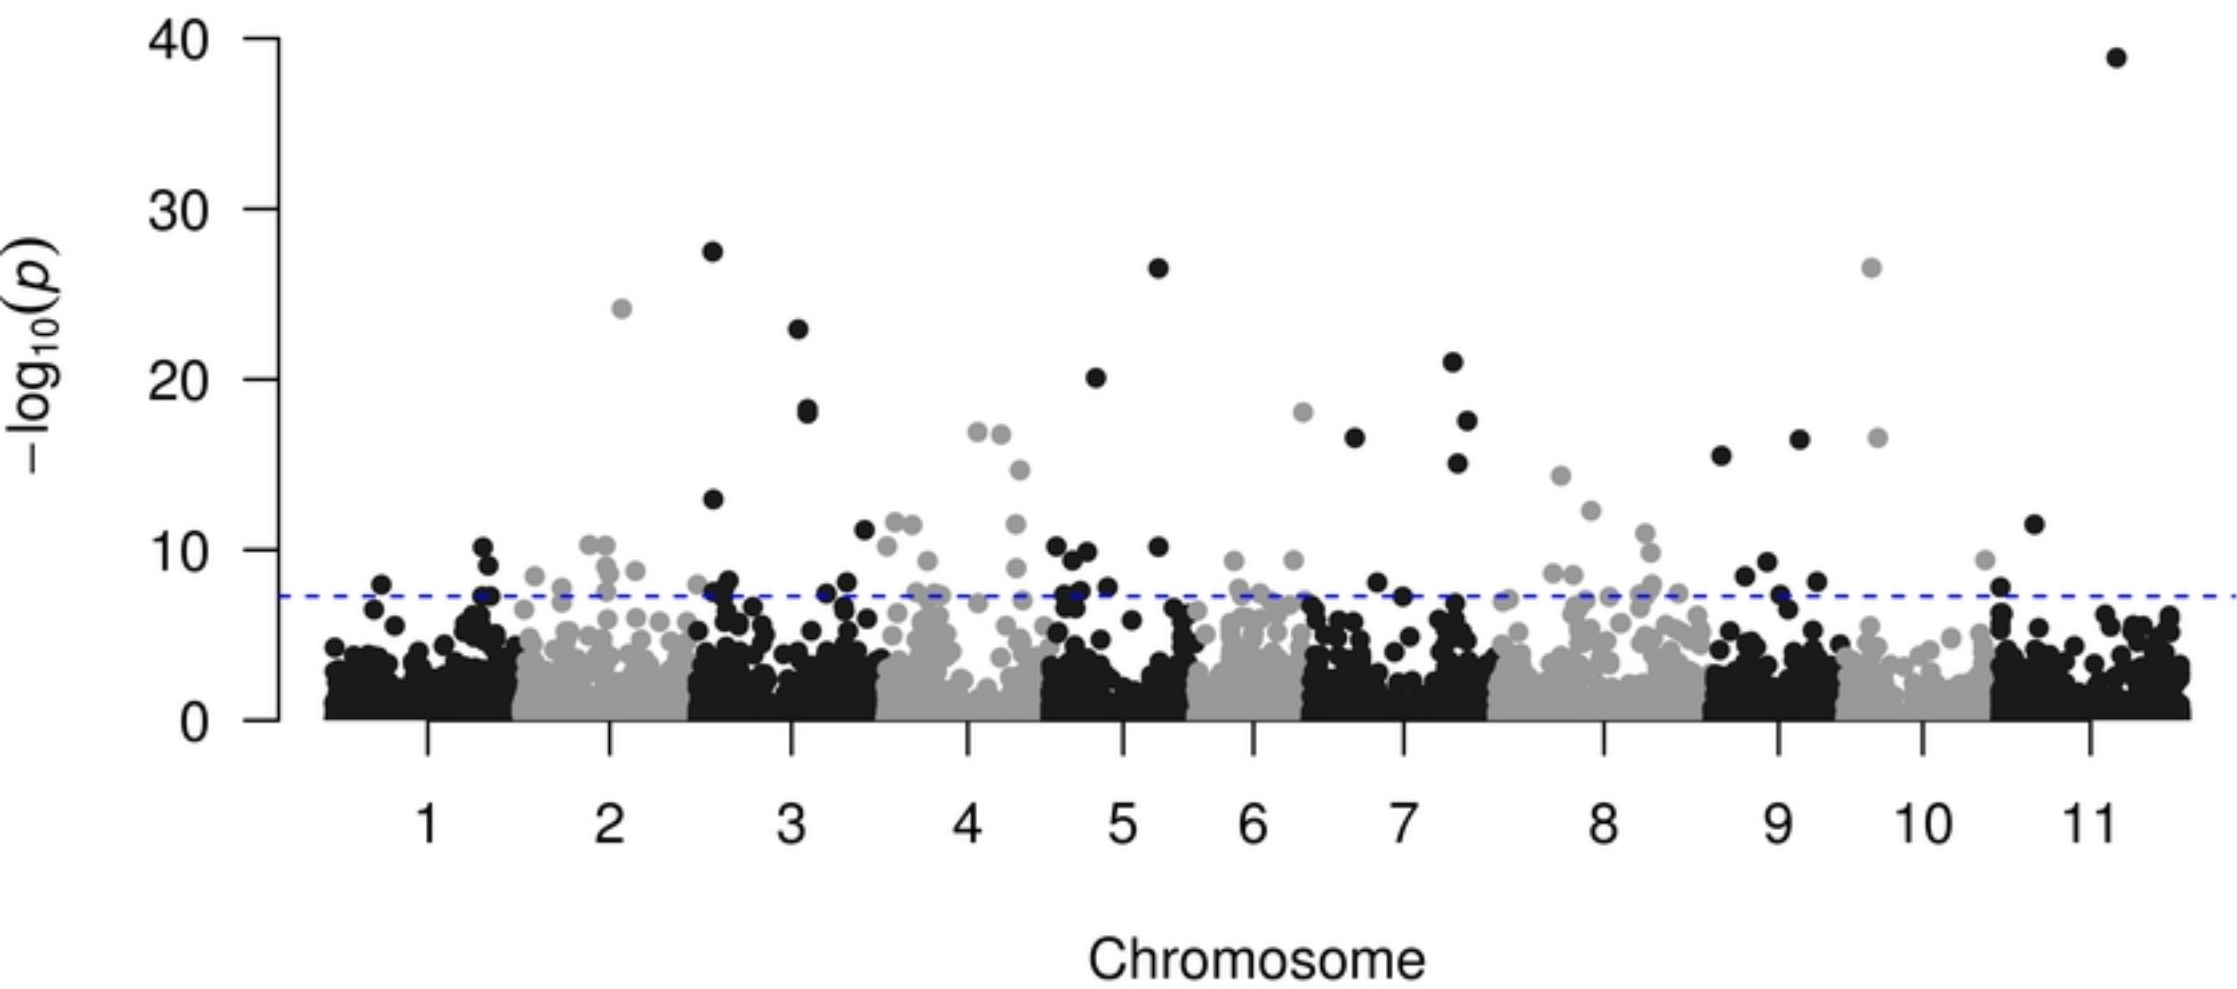

Figure 4

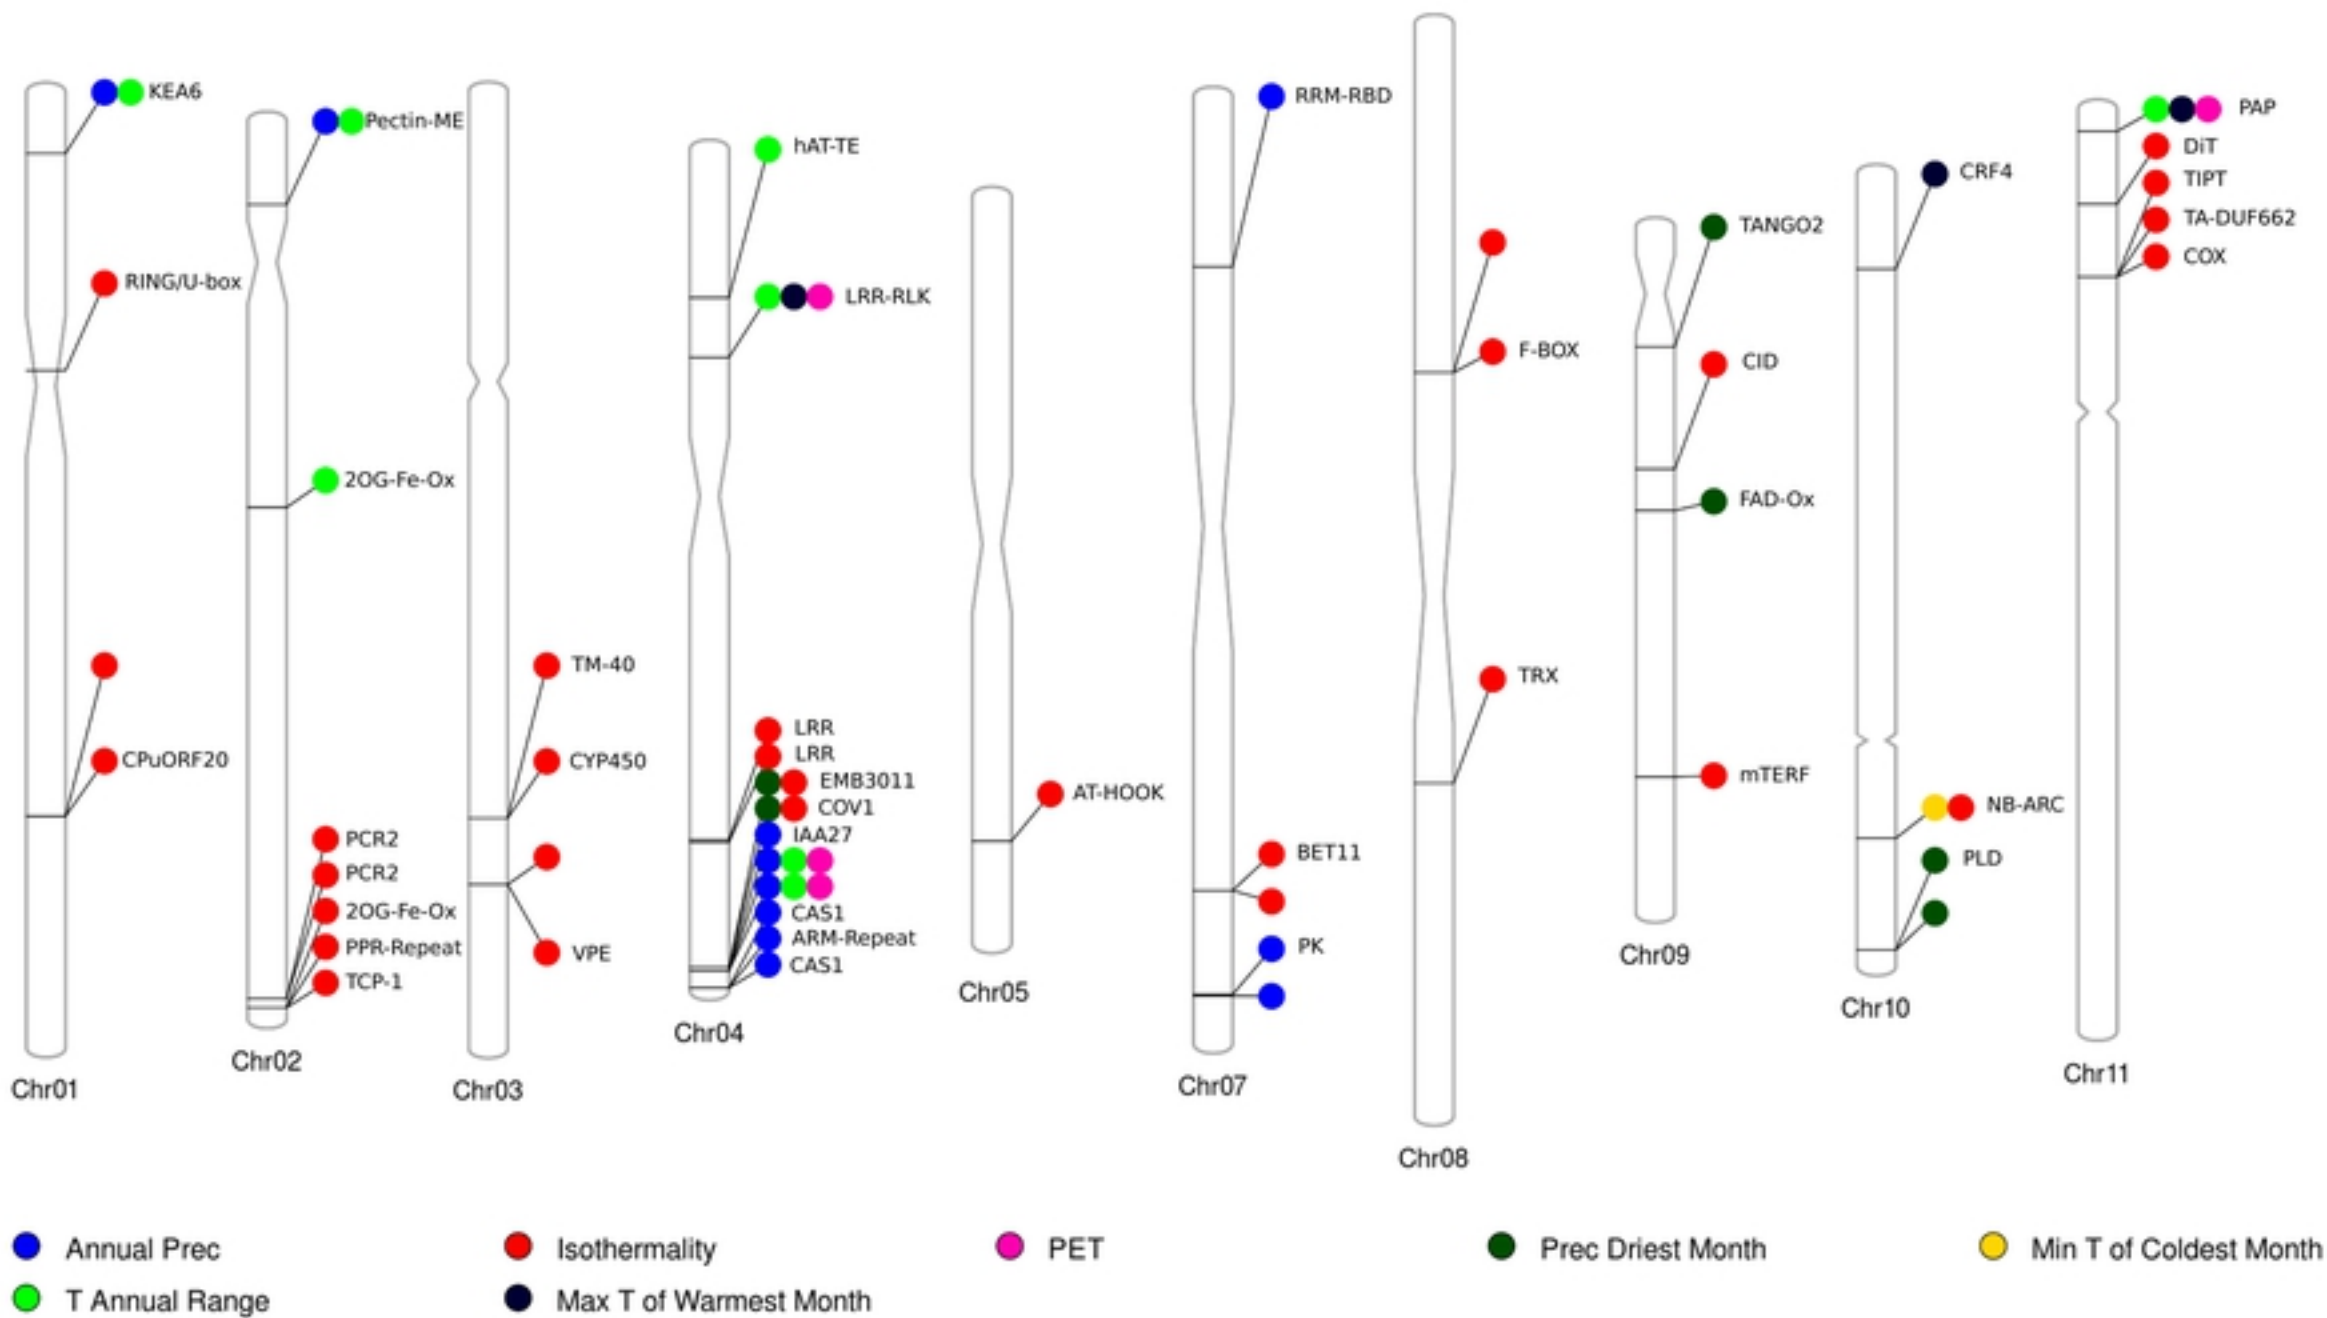

Figure 5

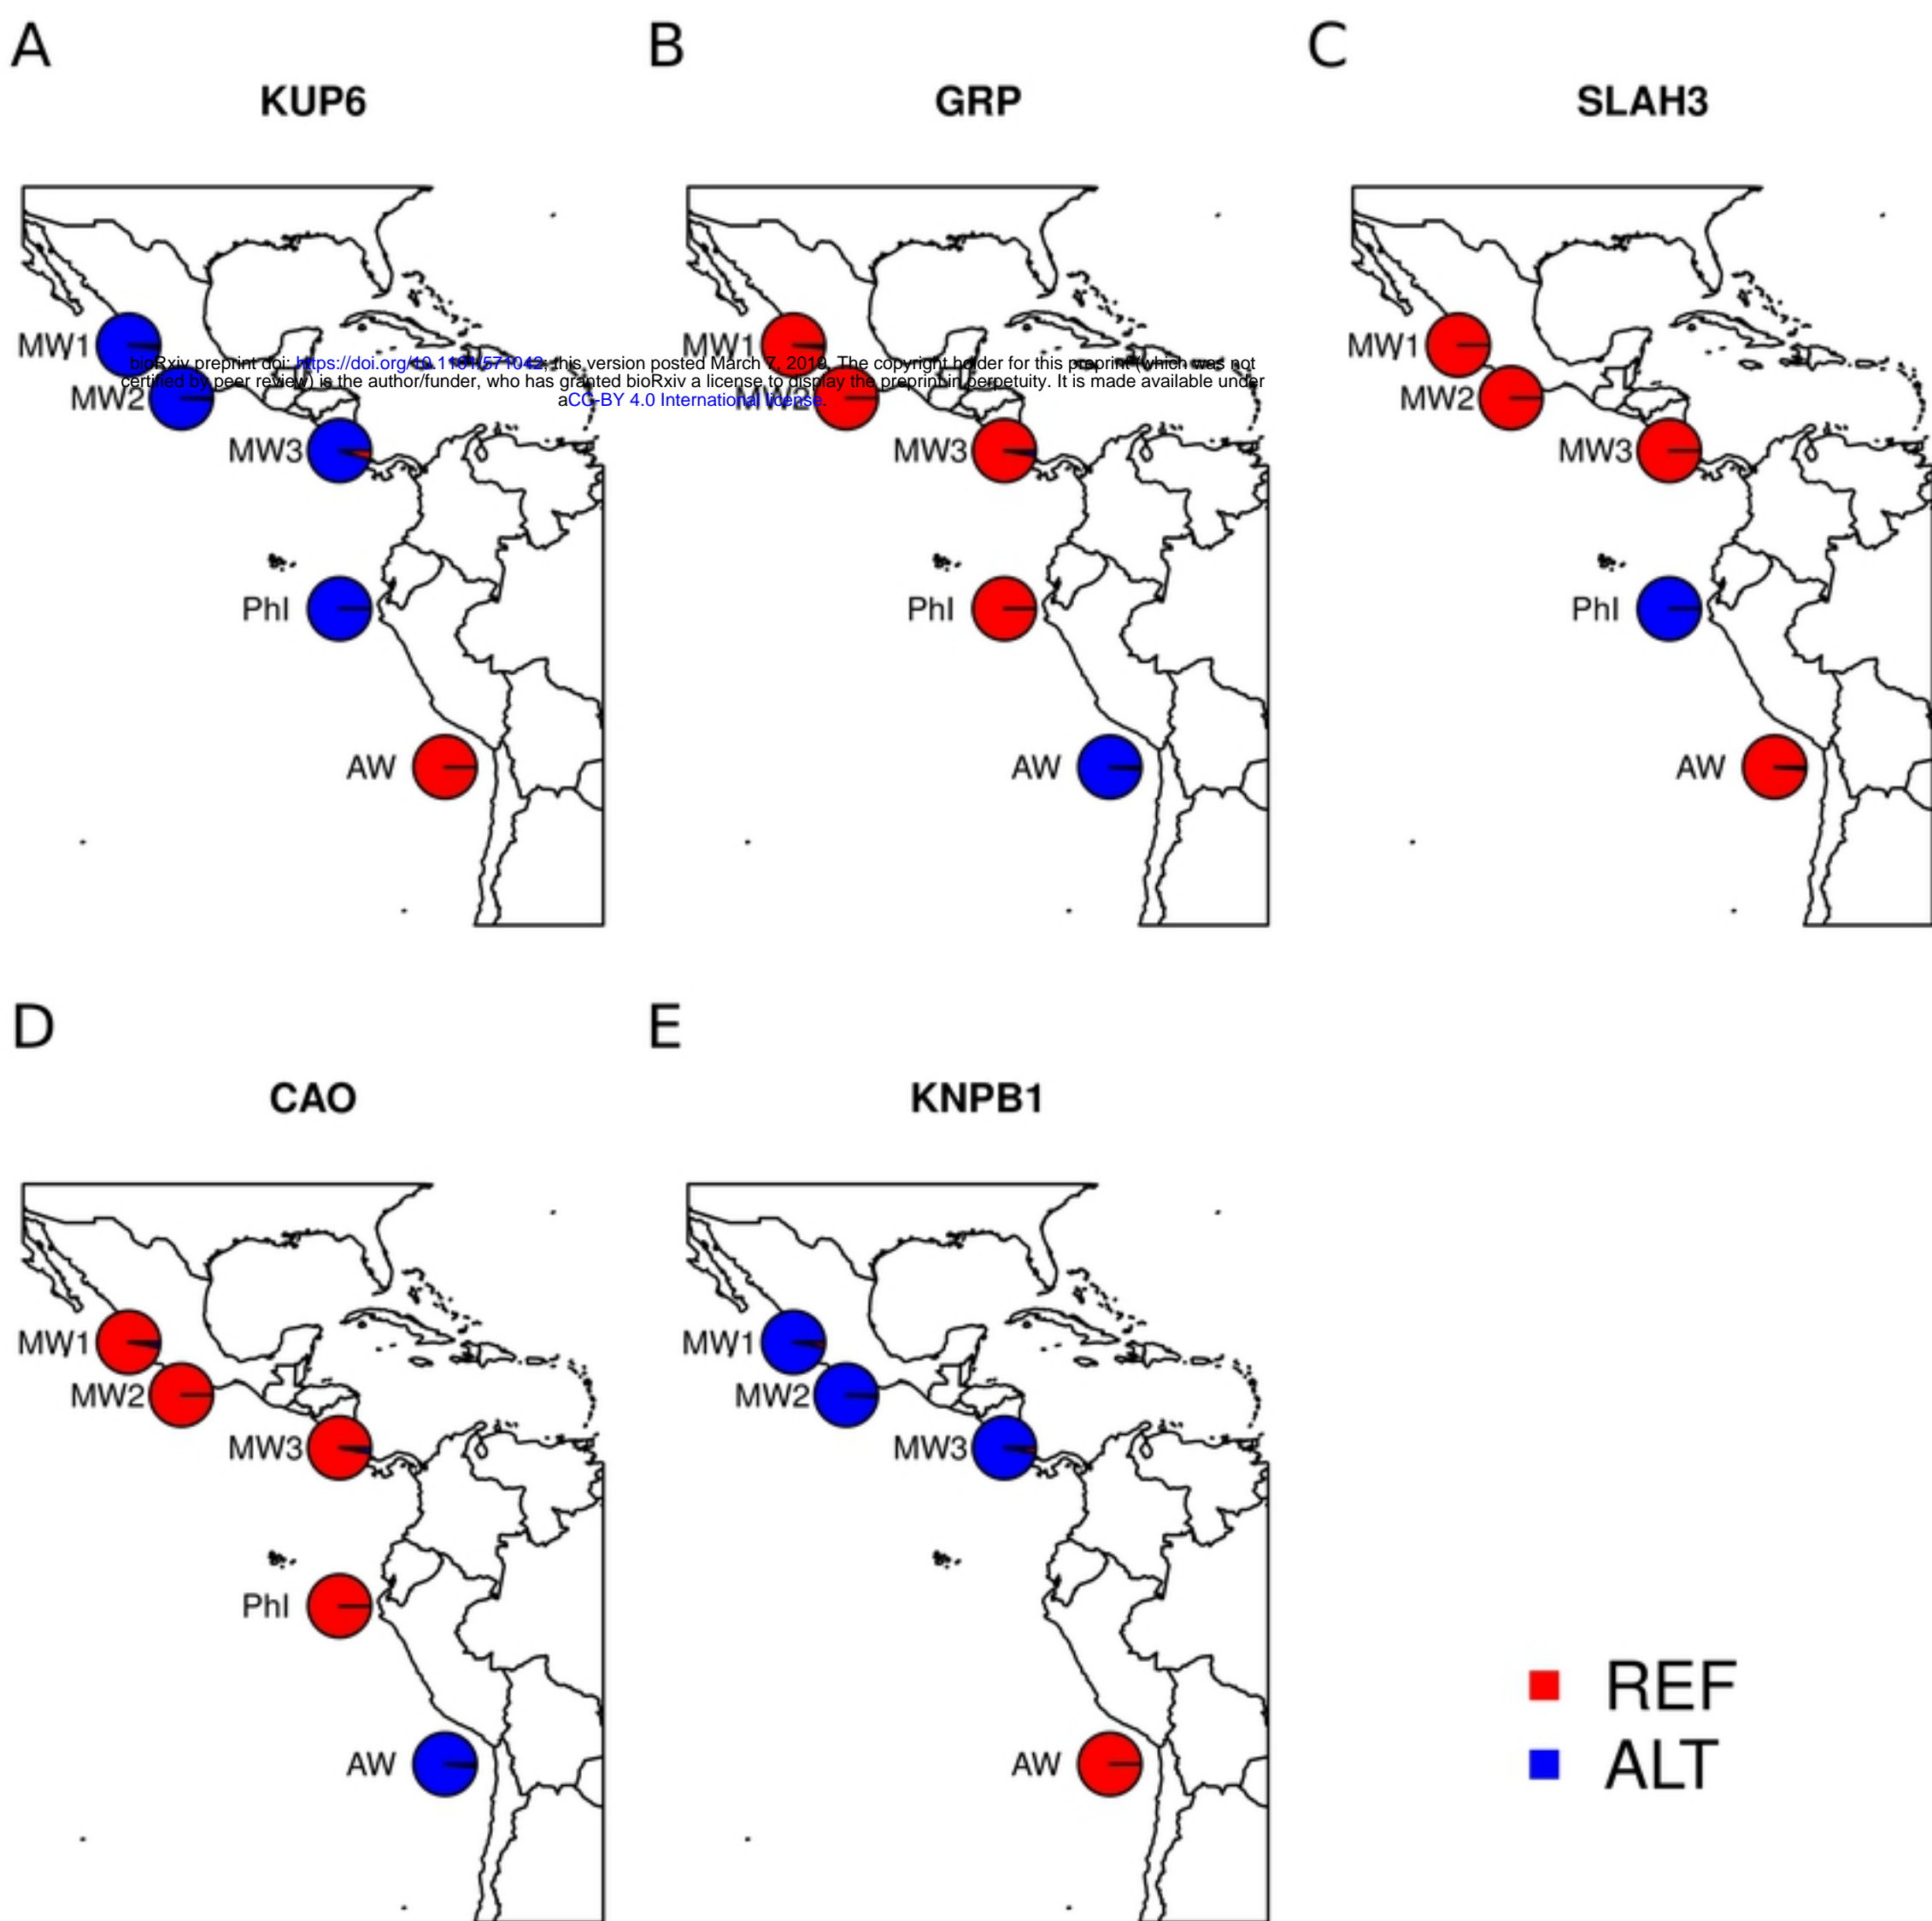

Figure 6

A

KEA6

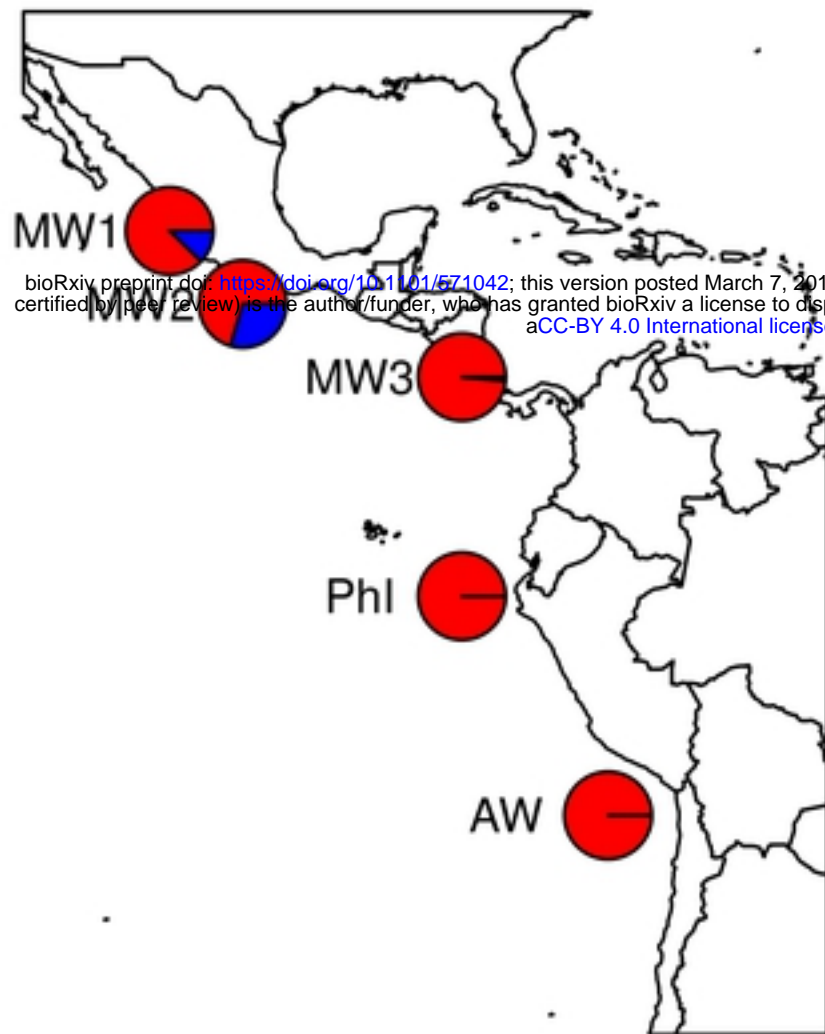

B

PLD

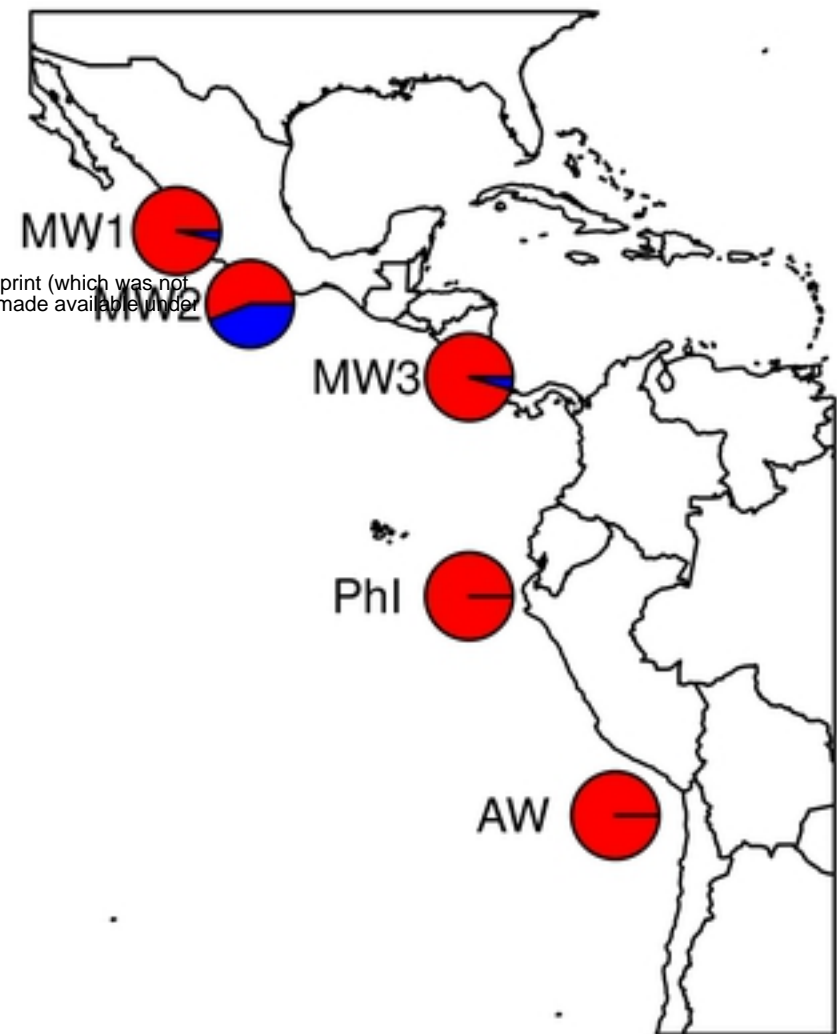

C

CRF

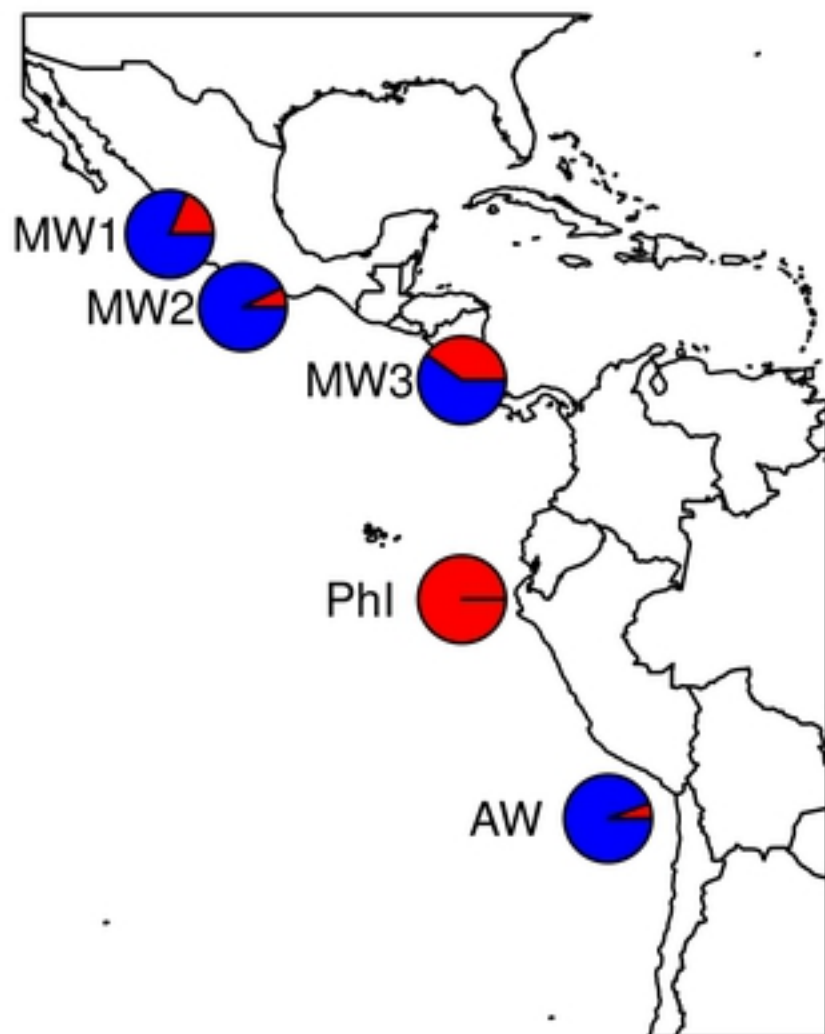

D

TRX

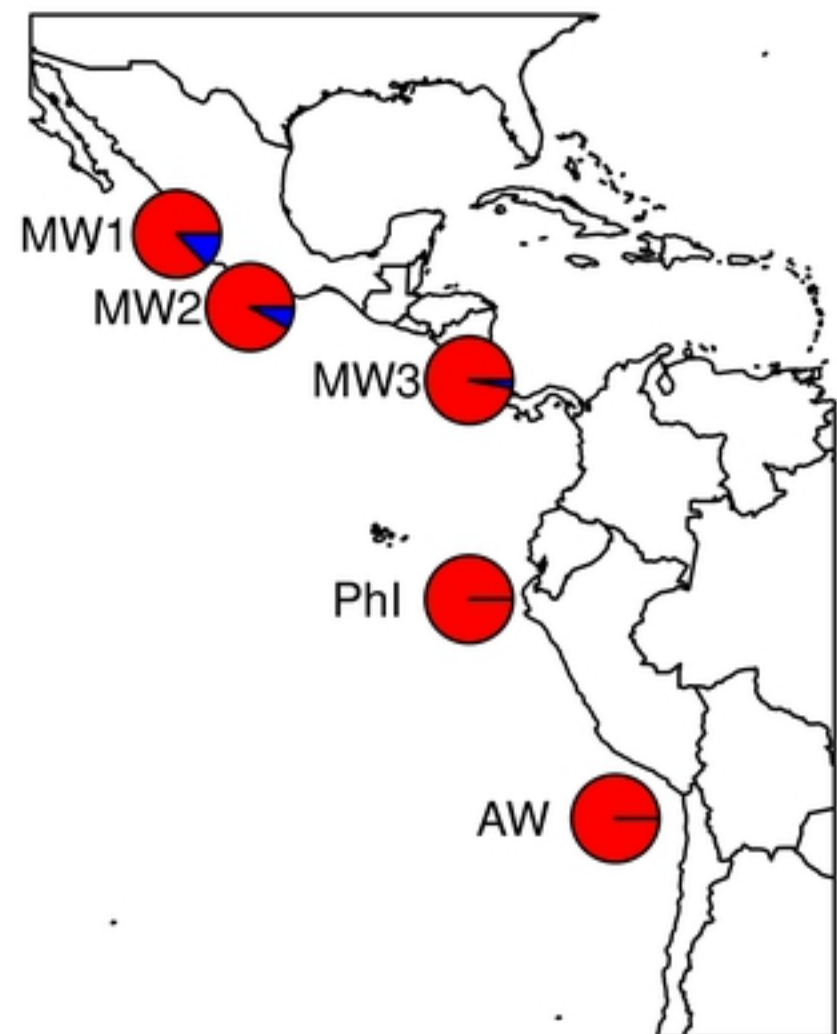

Figure 7
